# Supplementary material for: Spatial and Seasonal Distribution of American Whaling and Whales in the Age of Sail
Source: PLoS One. 2012 Apr 27;7(4):e34905. doi: 10.1371/journal.pone.0034905 (PMC3338773; doi:10.1371/journal.pone.0034905)
Supplement: Table S1 — List and description of the 1458 samples of whaling voyages. List of 1458 whaling voyages (by 689 American vessels) that were “sampled” by reading logbooks, 1780-1920. Shown are vessel name (Vessel), vessel number (Ves), voyage number (Voy), departure year (DepYr), and arrival year (ArrYr) [29]. The sources of the data are given as Src: CoML = Census of Marine Life, Maury = Matthew Fontaine Maury, and Town = Charles Haskins Townsend. Also shown are the number of days on which no whale observations were recorded (NoObs), the total number of whale observations recorded (Obs), the number of observations of identified whales (Sperm, Right, Bowhead, Humpback, Gray), and the number of other or unidentified whales (Other). NoObs is zero for all data from Townsend as that study did not record days when no whales were taken. Some samples of whaling voyages did not include any whale observations, although they did record the location of the vessel on most days. In some cases data from logbooks for the same voyage were available from more than one of the sources. See text for details on the data collection protocols used by the three sources. (XLS) [file pone.0034905.s014.xls]

## Sheet: Sheet1
	Vessel	Ves	Voy	DepYr	ArrYr	Src	NoObs	NumObs	Sperm	Right	Bowhead	Humpback	Gray	Other
1	A. E. Whyland	743	9	1915	1915	Town	0	12	12	0	0	0	0	0
2	A. Houghton	807	13	1876	1877	Town	0	4	0	0	4	0	0	0
4	A. J. Ross	431	15	1878	1878	Town	0	1	1	0	0	0	0	0
3	A. J. Ross	431	14	1877	1878	Town	0	4	0	4	0	0	0	0
5	A. R. Tucker	20	42	1853	1857	Town	0	19	19	0	0	0	0	0
6	A. R. Tucker	20	43	1857	1861	Town	0	13	13	0	0	0	0	0
7	A. R. Tucker	20	45	1861	1864	Town	0	19	19	0	0	0	0	0
8	A. R. Tucker	20	46	1864	1865	Town	0	20	10	0	0	10	0	0
9	A. R. Tucker	20	47	1865	1868	Town	0	13	10	3	0	0	0	0
10	A. R. Tucker	20	48	1868	1870	Town	0	11	5	0	0	6	0	0
11	A. R. Tucker	20	49	1871	1874	Town	0	14	14	0	0	0	0	0
12	A. R. Tucker	20	50	1874	1876	Town	0	15	15	0	0	0	0	0
13	A. R. Tucker	20	51	1876	1879	Town	0	22	22	0	0	0	0	0
14	A. R. Tucker	20	53	1880	1883	Town	0	20	12	2	0	6	0	0
15	A. R. Tucker	20	55	1887	1890	Town	0	40	33	7	0	0	0	0
16	A. R. Tucker	20	56	1891	1892	Town	0	7	1	0	6	0	0	0
17	A. R. Tucker	20	57	1893	1894	Town	0	2	0	0	2	0	0	0
18	A. R. Tucker	20	58	1895	1896	Town	0	2	1	0	1	0	0	0
19	A. R. Tucker	20	59	1897	1898	Town	0	2	0	0	2	0	0	0
20	A. R. Tucker	20	60	1899	1901	Town	0	42	42	0	0	0	0	0
21	A. R. Tucker	20	63	1901	1903	Town	0	36	36	0	0	0	0	0
22	A. R. Tucker	20	64	1903	1906	Town	0	43	43	0	0	0	0	0
23	A. T. Gifford	811	67	1910	1912	Town	0	5	0	0	5	0	0	0
24	Abbie Bradford	45	74	1878	1879	Town	0	6	0	0	6	0	0	0
25	Abbie Bradford	45	75	1880	1881	Town	0	3	0	0	2	0	0	0
26	Abbie Bradford	45	76	1882	1883	Town	0	4	0	0	4	0	0	0
27	Abbie Bradford	45	77	1884	1885	Town	0	2	0	0	2	0	0	0
28	Abbie Bradford	45	78	1886	1888	Town	0	1	0	0	1	0	0	0
29	Abbott Lawrence	48	89	1880	1881	Town	0	1	0	0	1	0	0	0
30	Abigail	1	102	1831	1835	Town	0	51	51	0	0	0	0	0
31	Abigail	1	103	1835	1838	Town	0	44	44	0	0	0	0	0
32	Abigail	1	107	1843	1847	Town	0	24	24	0	0	0	0	0
33	Abigail	1	111	1856	1860	Town	0	33	9	6	0	18	0	0
34	Abraham Barker	19	135	1845	1848	Town	0	7	3	4	0	0	0	0
35	Abraham Barker	19	136	1848	1850	Maury	581	79	5	74	0	0	0	0
36	Abraham Barker	19	137	1850	1853	Town	0	21	3	1	17	0	0	0
37	Abraham Barker	19	138	1853	1857	Town	0	7	4	1	1	0	0	1
39	Abraham Barker	19	140	1866	1870	Town	0	42	40	2	0	0	0	0
40	Abraham Barker	19	141	1871	1875	Town	0	130	31	0	0	99	0	0
38	Abraham Barker	19	139	1857	1861	Town	0	27	6	19	2	0	0	0
42	Abraham H. Howland	15	164	1845	1848	Maury	656	156	4	30	0	0	0	122
43	Abraham H. Howland	15	165	1848	1851	Maury	700	0	0	0	0	0	0	0
41	Acasta	815	163	1829	1830	Maury	281	56	0	0	0	0	0	56
44	Acasta	815	167	1830	1831	Maury	291	54	0	0	0	0	0	54
45	Acasta	815	168	1831	1832	Maury	173	56	0	0	0	0	0	56
46	Acasta	815	170	1832	1833	Maury	265	67	0	0	0	0	0	67
47	Acasta	815	171	1833	1834	Maury	197	54	0	0	0	0	0	54
48	Active	25	203	1856	1860	Town	0	36	34	0	0	2	0	0
49	Acushnet	819	209	1841	1845	Maury	1115	137	46	91	0	0	0	0
50	Acushnet	819	210	1845	1848	Town	0	21	13	8	0	0	0	0
51	Addison	3	225	1841	1845	Maury	951	112	26	28	0	0	0	58
52	Addison	3	231	1870	1874	Town	0	42	13	1	0	28	0	0
53	Addison	3	233	1867	1868	Town	0	8	8	0	0	0	0	0
54	Adeline	2	256	1850	1853	Town	0	4	1	0	3	0	0	0
55	Adeline	2	258	1856	1860	Town	0	19	2	3	13	1	0	0
56	Adeline	2	259	1860	1865	Town	0	55	4	0	18	1	32	0
57	Adeline	2	260	1865	1869	Town	0	20	9	5	5	0	1	0
58	Adeline	2	261	1869	1874	Town	0	39	17	7	0	15	0	0
59	Adeline Gibbs	33	263	1841	1845	Maury	1110	86	85	1	0	0	0	0
60	Adeline Gibbs	33	263	1841	1845	Town	0	2	2	0	0	0	0	0
61	Adeline Gibbs	33	264	1845	1848	Town	0	13	1	12	0	0	0	0
62	Adeline Gibbs	33	269	1866	1870	Town	0	48	38	10	0	0	0	0
63	Adeline Gibbs	33	271	1870	1875	Town	0	18	14	4	0	0	0	0
64	Adeline Gibbs	33	272	1875	1878	CoML	858	113	29	0	0	65	0	19
65	Adeline Gibbs	33	272	1875	1878	Town	0	47	14	0	0	33	0	0
66	Admiral Blake	822	277	1868	1871	Town	0	21	5	0	0	16	0	0
67	Admiral Blake	822	298	1860	1860	Town	0	4	4	0	0	0	0	0
68	Admiral Blake	822	299	1861	1861	Town	0	3	3	0	0	0	0	0
69	Admiral Blake	822	300	1862	1862	Town	0	1	1	0	0	0	0	0
70	Admiral Blake	822	301	1863	1863	Town	0	3	3	0	0	0	0	0
71	Admiral Blake	822	305	1865	1866	CoML	272	42	4	0	0	13	0	25
72	Aeronaut	826	313	1836	1838	Maury	150	0	0	0	0	0	0	0
73	Aeronaut	826	317	1843	1845	Maury	70	0	0	0	0	0	0	0
74	Aeronaut	826	318	1845	1848	CoML	859	220	20	59	0	21	0	120
75	Aeronaut	826	323	1831	1832	Maury	139	0	0	0	0	0	0	0
76	Aeronaut	826	324	1833	1834	Maury	96	0	0	0	0	0	0	0
77	Afton	28	330	1856	1858	Town	0	25	25	0	0	0	0	0
78	Alaska	41	376	1867	1871	Town	0	14	14	0	0	0	0	0
79	Alaska	41	381	1885	1889	Town	0	38	16	22	0	0	0	0
80	Albion	42	395	1829	1830	Town	0	21	0	21	0	0	0	0
81	Albion	42	396	1830	1831	Town	0	31	0	31	0	0	0	0
82	Albion	42	397	1831	1832	Town	0	23	0	23	0	0	0	0
84	Albion	42	399	1833	1834	Maury	133	65	2	10	0	0	0	53
83	Albion	42	399	1833	1834	Town	0	3	3	0	0	0	0	0
85	Albion	42	401	1834	1836	Maury	372	136	17	39	0	0	0	80
86	Albion	42	404	1840	1842	Maury	476	85	16	67	0	0	0	2
87	Albion	42	405	1842	1844	Maury	367	122	3	116	0	0	0	3
88	Albion	42	408	1844	1847	Maury	664	82	8	72	0	0	0	2
89	Albion	42	411	1854	1857	Town	0	23	2	18	3	0	0	0
90	Alciope	797	413	1842	1844	Maury	538	54	0	0	0	0	0	54
91	Alciope	797	414	1844	1847	Maury	775	116	0	0	0	0	0	116
92	Alcyone	798	433	1888	1889	CoML	251	52	13	0	0	1	0	38
93	Alcyone	798	434	1889	1890	CoML	295	101	17	0	0	4	0	80
94	Alcyone	798	435	1890	1891	CoML	285	47	29	0	0	5	0	13
95	Alcyone	798	436	1892	1892	CoML	182	63	53	0	0	0	0	10
96	Alert	834	446	1843	1845	Maury	325	83	0	0	0	0	0	83
97	Alert	834	449	1850	1853	Town	0	4	3	1	0	0	0	0
98	Alexander	5	455	1821	1824	CoML	979	173	132	5	0	4	0	32
99	Alexander	5	456	1824	1827	Maury	764	83	77	3	0	0	0	3
100	Alexander	5	457	1827	1831	Maury	796	59	58	1	0	0	0	0
101	Alexander	5	460	1838	1842	Town	0	42	42	0	0	0	0	0
102	Alexander	800	468	1886	1887	CoML	443	7	0	0	0	0	0	7
103	Alexander	800	468	1886	1887	Town	0	1	0	0	1	0	0	0
104	Alexander	841	503	1897	1897	Town	0	9	0	0	9	0	0	0
105	Alexander	841	505	1899	1899	Town	0	7	0	0	7	0	0	0
106	Alexander	841	506	1900	1900	Town	0	8	0	0	8	0	0	0
107	Alexander	841	507	1901	1901	Town	0	2	0	0	2	0	0	0
108	Alexander	841	508	1902	1902	Town	0	12	0	0	12	0	0	0
109	Alexander	841	509	1903	1903	Town	0	5	0	0	5	0	0	0
110	Alexander Coffin	13	513	1832	1836	Maury	982	95	91	4	0	0	0	0
111	Alexander Mansfield	835	521	1832	1833	Town	0	20	2	18	0	0	0	0
112	Alfred Tyler	801	539	1844	1848	Maury	1097	92	17	1	0	0	0	74
113	Alfred Tyler	801	539	1844	1848	Town	0	26	22	4	0	0	0	0
114	Alibree	802	540	1844	1847	Maury	59	0	0	0	0	0	0	0
115	Alice	842	545	1844	1846	Maury	386	90	0	0	0	0	0	90
116	Alice	842	546	1846	1849	Maury	569	81	2	0	0	0	0	79
117	Alice Knowles	44	559	1908	1910	Town	0	37	24	13	0	0	0	0
118	Alice Knowles	44	560	1910	1913	Town	0	50	50	0	0	0	0	0
119	Alice Knowles	44	575	1897	1898	Town	0	10	10	0	0	0	0	0
120	Alice Mandell	21	586	1851	1855	Town	0	16	1	0	15	0	0	0
121	Almira	806	665	1833	1837	Maury	785	105	54	3	0	0	0	48
122	Almira	806	665	1833	1837	Town	0	4	0	4	0	0	0	0
123	Almira	806	672	1858	1861	Town	0	24	18	1	0	5	0	0
124	Almira	806	673	1864	1868	Town	0	25	3	4	6	8	4	0
125	Almira	806	674	1869	1870	Town	0	5	4	0	1	0	0	0
126	Alpha	36	690	1846	1850	Town	0	26	22	4	0	0	0	0
127	Alpha	36	692	1855	1859	Town	0	19	19	0	0	0	0	0
128	Alpha	36	693	1860	1865	Town	0	22	22	0	0	0	0	0
129	Altamaha	849	705	1861	1861	Town	0	2	2	0	0	0	0	0
130	Amanda	58	725	1830	1831	Town	0	17	2	15	0	0	0	0
131	Amanda	58	726	1831	1832	Town	0	19	0	19	0	0	0	0
132	Amazon	853	747	1832	1833	Maury	116	45	0	45	0	0	0	0
133	Amazon	853	750	1839	1841	Maury	389	55	15	39	0	0	0	1
134	Amazon	853	752	1845	1848	Maury	719	129	6	119	0	0	0	4
135	Amazon	853	753	1848	1852	Town	0	18	18	0	0	0	0	0
136	Amazon	853	754	1852	1856	Town	0	1	0	0	0	0	0	1
137	Amazon	853	755	1856	1860	Town	0	19	3	3	13	0	0	0
138	Amelia	61	775	1876	1877	CoML	186	29	6	0	0	2	0	21
139	Amelia	61	776	1877	1879	CoML	514	106	5	0	0	4	0	97
141	America	6	809	1835	1838	Maury	658	102	37	64	0	0	0	1
142	America	6	812	1838	1840	Maury	302	68	9	59	0	0	0	0
143	America	6	815	1843	1845	Town	0	13	2	11	0	0	0	0
144	America	6	818	1845	1848	Maury	605	110	6	104	0	0	0	0
145	America	6	820	1848	1851	Maury	674	48	11	4	0	0	0	33
146	America	6	820	1848	1851	Town	0	5	2	0	3	0	0	0
140	America	14	803	1855	1858	CoML	546	87	24	0	0	3	0	57
147	America	14	826	1853	1854	CoML	390	90	28	0	0	0	0	62
148	America	2745	839	1842	1844	CoML	30	10	6	0	0	0	0	4
149	American	865	846	1838	1841	Maury	813	79	60	4	0	0	0	15
150	American	867	855	1832	1833	Maury	303	0	0	0	0	0	0	0
151	American	867	856	1834	1835	Maury	502	97	0	0	0	0	0	97
152	Amethyst	8	879	1844	1846	Maury	384	85	8	26	0	0	0	51
153	Amy M. Sacker	746	894	1886	1889	Town	0	6	6	0	0	0	0	0
154	Andrew Hicks	703	908	1908	1910	Town	0	39	28	11	0	0	0	0
155	Andrew Hicks	703	909	1911	1914	Town	0	52	48	4	0	0	0	0
156	Andrew Hicks	703	920	1890	1891	Town	0	4	2	0	2	0	0	0
157	Andrew Hicks	703	937	1904	1905	Town	0	7	5	0	2	0	0	0
158	Andrew Hicks	703	939	1905	1906	Town	0	10	10	0	0	0	0	0
159	Andrew Hicks	703	940	1906	1908	Town	0	13	9	4	0	0	0	0
160	Andrews	34	953	1865	1866	Town	0	10	0	0	10	0	0	0
161	Ann Alexander	7	1004	1841	1845	Town	0	34	34	0	0	0	0	0
162	Ann Alexander	7	1005	1845	1849	Town	0	35	35	0	0	0	0	0
165	Ann Maria	878	1015	1838	1839	CoML	368	65	24	0	0	3	0	38
166	Ann Maria	879	1030	1835	1837	Town	0	34	2	32	0	0	0	0
167	Ann Maria	879	1031	1837	1839	Town	0	24	4	20	0	0	0	0
168	Ann Maria	879	1032	1839	1841	Maury	243	0	0	0	0	0	0	0
163	Ann Maria	878	1014	1837	1838	CoML	200	30	7	0	0	4	0	19
164	Ann Maria	878	1014	1837	1838	Town	0	3	3	0	0	0	0	0
169	Ann Mary Ann	880	1035	1845	1848	Maury	696	68	0	0	0	0	0	68
170	Ann Parry	881	1039	1842	1845	Town	0	35	34	0	0	0	0	1
171	Annawan	887	1044	1836	1837	CoML	118	79	15	0	0	18	0	46
172	Annawan II	35	1056	1854	1855	Town	0	7	7	0	0	0	0	0
173	Annawan II	35	1057	1855	1857	Town	0	13	12	0	0	1	0	0
174	Annawan II	35	1058	1857	1859	Town	0	13	13	0	0	0	0	0
175	Annawan II	35	1059	1859	1862	Town	0	10	9	0	0	1	0	0
176	Annawan II	35	1063	1867	1870	Town	0	12	12	0	0	0	0	0
177	Ansel Gibbs	46	1078	1839	1842	Town	0	39	39	0	0	0	0	0
178	Ansel Gibbs	46	1083	1860	1861	Town	0	5	0	0	5	0	0	0
179	Ansel Gibbs	46	1085	1864	1865	Town	0	2	0	0	2	0	0	0
180	Ansel Gibbs	46	1087	1867	1868	Town	0	4	4	0	0	0	0	0
181	Ansel Gibbs	46	1088	1868	1869	Town	0	8	0	1	7	0	0	0
182	Ansel Gibbs	46	1089	1869	1870	Town	0	4	4	0	0	0	0	0
183	Ansel Gibbs	46	1091	1871	1872	Town	0	7	1	0	6	0	0	0
184	Antarctic	893	1097	1890	1892	Town	0	27	27	0	0	0	0	0
185	Antelope	29	1133	1864	1866	Town	0	14	0	0	14	0	0	0
186	Antelope	29	1135	1855	1859	Town	0	9	7	0	2	0	0	0
187	Apollo	895	1138	1818	1820	Maury	346	1	0	1	0	0	0	0
188	Aquetnet	898	1145	1852	1852	Maury	54	18	1	1	0	0	0	16
189	Arab	39	1149	1831	1834	Maury	763	208	92	4	0	0	0	112
190	Arab	899	1156	1838	1840	Maury	222	20	1	19	0	0	0	0
191	Arab	899	1159	1842	1845	Maury	746	88	23	37	0	0	0	28
192	Arab	899	1159	1842	1845	Town	0	38	26	12	0	0	0	0
193	Arab	899	1163	1849	1853	Town	0	7	7	0	0	0	0	0
194	Arabella	17	1177	1849	1851	Town	0	8	5	3	0	0	0	0
195	Arabella	17	1179	1830	1833	Town	0	48	48	0	0	0	0	0
196	Arabella	17	1180	1833	1837	Town	0	49	48	1	0	0	0	0
197	Arabella	17	1181	1837	1839	Town	0	15	5	10	0	0	0	0
198	Archer	9	1193	1856	1861	Town	0	23	23	0	0	0	0	0
199	Argonaut	909	1216	1823	1824	Maury	202	55	0	0	0	0	0	55
200	Argonaut	909	1217	1824	1825	Maury	14	0	0	0	0	0	0	0
201	Argonaut	909	1218	1826	1827	Maury	188	45	0	0	0	0	0	45
202	Arnolda	18	1253	1848	1852	Maury	880	0	0	0	0	0	0	0
203	Arnolda	18	1255	1855	1859	Town	0	34	4	8	22	0	0	0
204	Arnolda	18	1256	1859	1863	Town	0	18	18	0	0	0	0	0
205	Arnolda	18	1257	1863	1867	Town	0	13	0	1	12	0	0	0
206	Arnolda	18	1258	1867	1871	Town	0	23	23	0	0	0	0	0
207	Arnolda	18	1259	1872	1876	Town	0	27	11	0	13	1	2	0
208	Asia	916	1286	1791	1794	CoML	763	93	6	3	0	29	0	55
209	Asia	916	1286	1791	1794	Town	0	27	5	14	0	8	0	0
210	Atkins Adams	920	1303	1858	1863	Town	0	13	13	0	0	0	0	0
213	Atlantic	23	1334	1851	1854	Town	0	25	23	1	0	0	0	1
214	Atlantic	23	1339	1865	1868	Town	0	36	15	21	0	0	0	0
215	Atlantic	23	1340	1868	1872	Town	0	30	24	6	0	0	0	0
216	Atlantic	23	1343	1876	1879	Town	0	26	14	12	0	0	0	0
218	Atlantic	23	1354	1881	1882	Town	0	7	0	0	7	0	0	0
211	Atlantic	921	1314	1844	1847	Maury	549	103	3	0	0	0	0	100
212	Atlantic	922	1324	1839	1843	Maury	960	67	0	0	0	0	0	67
217	Atlantic	923	1347	1845	1848	Maury	211	0	0	0	0	0	0	0
221	Atlas	926	1390	1825	1826	CoML	245	150	1	3	0	0	0	146
222	Atlas	926	1390	1825	1826	Town	0	11	1	10	0	0	0	0
223	Atlas	926	1391	1826	1828	Town	0	15	5	10	0	0	0	0
220	Atlas	927	1376	1813	Unk	Town	0	3	3	0	0	0	0	0
219	Atlas	926	1367	1830	1830	Town	0	18	2	16	0	0	0	0
224	Attleboro	438	1402	1880	1883	Town	0	25	9	0	0	16	0	0
229	Aurora	37	1438	1865	1871	Town	0	43	7	0	35	1	0	0
225	Aurora	935	1422	1882	1884	Town	0	11	11	0	0	0	0	0
226	Aurora	935	1423	1884	1885	Town	0	18	15	0	0	3	0	0
227	Aurora	936	1429	1819	1822	Town	0	5	5	0	0	0	0	0
228	Aurora	936	1436	1845	1848	Town	0	38	38	0	0	0	0	0
230	Autumn	942	1448	1845	1849	Town	0	12	12	0	0	0	0	0
231	Averick	11	1452	1836	1840	Maury	1047	72	62	1	0	0	0	9
232	Avola	40	1457	1867	1870	Town	0	19	19	0	0	0	0	0
233	Awashonks	31	1465	1836	1840	Maury	917	109	87	2	0	0	0	20
234	Awashonks	31	1468	1848	1851	Town	0	29	6	8	15	0	0	0
235	Awashonks	31	1469	1851	1854	Town	0	24	7	0	17	0	0	0
236	Awashonks	31	1471	1860	1862	Town	0	4	3	1	0	0	0	0
237	Awashonks	31	1473	1862	1865	Town	0	15	11	4	0	0	0	0
238	Awashonks	31	1474	1865	1870	Town	0	41	6	2	30	0	3	0
239	Balaena	64	1488	1818	1821	CoML	728	264	70	1	0	29	0	164
240	Balaena	64	1492	1830	1834	Maury	585	70	65	0	0	0	0	5
241	Balaena	64	1495	1841	1845	Town	0	33	30	2	0	0	0	1
242	Balance	950	1518	1833	1837	Town	0	26	26	0	0	0	0	0
243	Baltic	951	1522	1828	1831	Town	0	48	48	0	0	0	0	0
244	Barbara	955	1542	1844	1847	Maury	266	0	0	0	0	0	0	0
245	Barclay	67	1574	1834	1837	Town	0	30	30	0	0	0	0	0
247	Barclay	67	1579	1850	1852	CoML	597	120	29	0	0	14	0	77
248	Barclay	67	1580	1852	1854	Town	0	16	11	5	0	0	0	0
249	Barclay	67	1581	1854	1857	CoML	842	338	24	58	0	59	0	196
250	Barclay	67	1581	1854	1857	Town	0	23	10	10	0	3	0	0
251	Barclay	957	1587	1849	1850	CoML	18	2	0	0	0	0	0	2
252	Barclay	957	1589	1853	1854	Town	0	9	9	0	0	0	0	0
246	Barclay	67	1578	1844	1850	Town	0	40	40	0	0	0	0	0
253	Bartholomew Gosnold	72	1603	1862	1866	Town	0	2	0	0	2	0	0	0
254	Bartholomew Gosnold	72	1604	1866	1870	Town	0	34	34	0	0	0	0	0
255	Bartholomew Gosnold	72	1605	1871	1876	Town	0	2	2	0	0	0	0	0
256	Bartholomew Gosnold	72	1607	1876	1880	Town	0	43	22	5	0	16	0	0
257	Bartholomew Gosnold	72	1608	1881	1885	Town	0	22	22	0	0	0	0	0
258	Beaver	959	1627	1840	1842	Town	0	4	3	1	0	0	0	0
259	Bedford	2869	1642	1797	1799	Town	0	1	0	1	0	0	0	0
260	Belle	963	1646	1857	1862	Town	0	26	25	0	0	1	0	0
261	Bellisle	965	1660	1849	1849	Town	0	4	4	0	0	0	0	0
262	Beluga	966	1671	1897	1899	Town	0	50	0	0	50	0	0	0
263	Beluga	966	1672	1900	1901	Town	0	11	0	0	11	0	0	0
264	Beluga	966	1673	1902	1902	Town	0	4	0	0	4	0	0	0
265	Beluga	966	1674	1903	1903	Town	0	3	0	0	3	0	0	0
266	Belvedere	707	1685	1885	1885	Town	0	5	0	0	5	0	0	0
267	Belvedere	707	1692	1890	Unk	Town	0	8	1	0	7	0	0	0
268	Belvedere	707	1703	1897	1898	Town	0	4	0	0	4	0	0	0
269	Benezet	724	1731	1833	1836	Town	0	33	33	0	0	0	0	0
270	Bengal	968	1736	1832	1835	Town	0	33	33	0	0	0	0	0
271	Bengal	968	1738	1837	1840	Town	0	30	6	24	0	0	0	0
272	Benjamin Cummings	75	1741	1854	1859	Town	0	35	35	0	0	0	0	0
273	Benjamin Cummings	75	1745	1866	1871	CoML	860	227	9	14	111	8	41	40
274	Benjamin Cummings	75	1745	1866	1871	Town	0	34	10	1	22	0	1	0
276	Benjamin Franklin	716	1757	1858	1860	CoML	152	124	29	0	0	27	0	67
277	Benjamin Franklin	716	1759	1863	1865	Town	0	15	15	0	0	0	0	0
278	Benjamin Morgan	970	1761	1843	1846	Maury	561	133	8	8	0	0	0	117
279	Benjamin Rush	971	1768	1833	1837	Town	0	32	32	0	0	0	0	0
280	Benjamin Rush	971	1770	1841	1845	Town	0	25	20	5	0	0	0	0
281	Benjamin Tucker	63	1782	1846	1849	Maury	732	124	7	113	0	0	0	4
282	Benjamin Tucker	63	1784	1851	1855	Town	0	30	7	0	23	0	0	0
283	Benjamin Tucker	63	1786	1855	1859	Town	0	3	2	1	0	0	0	0
284	Benjamin Tucker	63	1787	1859	1861	Town	0	13	10	3	0	0	0	0
285	Benjamin Tucker	63	1789	1861	1862	Town	0	10	10	0	0	0	0	0
286	Bertha	440	1794	1887	1891	Town	0	41	40	0	0	1	0	0
287	Bertha	440	1795	1891	1894	Town	0	26	22	4	0	0	0	0
288	Bertha	440	1798	1901	1904	Town	0	49	49	0	0	0	0	0
289	Bertha	440	1799	1905	1907	Town	0	66	66	0	0	0	0	0
290	Bertha	440	1800	1907	1909	Town	0	51	51	0	0	0	0	0
291	Bertha	440	1802	1910	1911	Town	0	17	17	0	0	0	0	0
292	Bertha	440	1804	1916	1916	CoML	92	56	39	0	0	0	0	17
293	Bertha D. Nickerson	751	1807	1906	1908	Town	0	63	63	0	0	0	0	0
294	Bertha D. Nickerson	751	1809	1909	1911	Town	0	50	50	0	0	0	0	0
295	Bertha D. Nickerson	751	1811	1913	1915	CoML	246	54	42	0	0	0	0	12
296	Betsey Williams	74	1852	1849	1851	Town	0	20	5	6	9	0	0	0
297	Betsey Williams	74	1853	1851	1854	CoML	716	344	7	12	56	15	35	218
298	Bevis	77	1858	1850	1853	Town	0	19	19	0	0	0	0	0
299	Bevis	77	1860	1856	1857	Town	0	9	5	0	0	4	0	0
300	Bingham	986	1862	1833	1834	Maury	129	49	0	0	0	0	0	49
301	Bingham	986	1866	1839	1840	CoML	182	49	4	23	0	2	0	20
302	Black Eagle	78	1875	1862	1863	Town	0	18	0	0	18	0	0	0
303	Black Eagle	78	1876	1864	1865	Town	0	13	0	0	13	0	0	0
304	Black Eagle	78	1877	1866	1867	Town	0	4	1	0	3	0	0	0
305	Black Eagle	78	1880	1851	1854	Town	0	21	1	0	0	0	0	4
306	Black Warrior	987	1882	1842	1845	Maury	640	53	14	0	0	0	0	39
308	Blackstone	989	1893	1835	1837	Town	0	17	1	16	0	0	0	0
309	Blackstone	989	1894	1837	1839	Town	0	28	3	25	0	0	0	0
310	Blackstone	989	1896	1841	1843	Maury	16	0	0	0	0	0	0	0
312	Blackstone	989	1897	1843	1845	Maury	307	44	3	0	0	0	0	41
311	Blackstone	989	1897	1843	1845	Town	0	22	2	20	0	0	0	0
313	Blackstone	989	1898	1845	1846	Maury	80	3	0	0	0	0	0	3
307	Blackstone	989	1890	1833	1834	Town	0	11	4	7	0	0	0	0
314	Bogota	65	1909	1840	1842	CoML	471	63	11	0	0	1	0	51
315	Bogota	65	1909	1840	1842	Town	0	10	10	0	0	0	0	0
316	Bogota	65	1910	1842	1843	Town	0	5	5	0	0	0	0	0
317	Bohio	993	1911	1868	1872	Town	0	21	12	0	0	9	0	0
318	Boston	999	1937	1832	1833	Maury	150	54	0	0	0	0	0	54
319	Boston	999	1942	1837	1838	Maury	318	57	2	4	0	0	0	51
320	Bourbon	722	1968	1823	1824	Town	0	22	0	22	0	0	0	0
321	Boy	1004	1993	1836	1839	Maury	761	45	17	0	0	0	0	28
322	Braganza	69	2000	1840	1843	Town	0	37	9	28	0	0	0	0
323	Brandt	66	2021	1838	1839	Town	0	19	6	13	0	0	0	0
324	Brandt	66	2025	1849	1852	Town	0	23	23	0	0	0	0	0
325	Brewster	717	2036	1863	1865	Town	0	31	31	0	0	0	0	0
326	Bruce	1013	2088	1848	1851	Town	0	32	15	15	2	0	0	0
327	Brunette	1014	2096	1837	1838	Maury	152	14	14	0	0	0	0	0
328	Brunette	1014	2097	1838	1839	Maury	149	3	3	0	0	0	0	0
329	Brunswick	71	2103	1859	1862	Town	0	12	11	1	0	0	0	0
330	Brunswick	71	2105	1846	1848	Maury	450	83	21	62	0	0	0	0
331	Brunswick	71	2107	1862	1865	Town	0	28	2	0	11	0	15	0
332	By Chance	1015	2117	1825	1826	Town	0	7	7	0	0	0	0	0
334	By Chance	1015	2118	1826	1828	CoML	217	55	12	0	0	2	0	41
333	By Chance	1015	2118	1826	1828	Town	0	5	4	0	0	1	0	0
335	Cabinet	1016	2132	1845	1848	Maury	406	78	0	0	0	0	0	78
336	Cadmus	1019	2143	1831	1834	CoML	918	158	111	1	0	7	0	39
337	Cadmus	1021	2157	1829	1830	Maury	180	70	1	0	0	0	0	69
338	Cadmus	1021	2158	1831	1832	Maury	146	20	1	0	0	0	0	19
339	Cadmus	1021	2171	1847	1849	Maury	278	0	0	0	0	0	0	0
340	Caledonia	1024	2182	1837	1839	CoML	539	106	13	41	0	2	0	50
341	California	93	2190	1846	1849	Maury	619	85	16	69	0	0	0	0
342	California	93	2194	1854	1858	Town	0	38	4	4	30	0	0	0
343	California	93	2196	1862	1866	Town	0	37	1	2	17	0	17	0
344	California	93	2197	1866	1871	Town	0	13	2	0	8	3	0	0
345	California	93	2199	1872	1876	Town	0	33	33	0	0	0	0	0
346	California	93	2202	1886	1889	Town	0	41	29	12	0	0	0	0
347	California	93	2214	1898	1899	Town	0	15	12	3	0	0	0	0
349	Callao	80	2223	1842	1845	Maury	771	73	16	3	0	0	0	54
348	Callao	80	2223	1842	1845	Town	0	31	16	15	0	0	0	0
350	Callao	80	2228	1858	1862	Town	0	7	5	2	0	0	0	0
351	Callao	80	2230	1865	1870	Town	0	27	23	1	0	3	0	0
352	Callao	80	2232	1875	1877	Town	0	12	12	0	0	0	0	0
353	Cambria	82	2243	1858	1862	Town	0	40	9	2	15	0	13	1
354	Camilla	132	2255	1862	1867	Town	0	39	4	0	33	2	0	0
355	Camilla	132	2257	1867	1871	Town	0	39	39	0	0	0	0	0
356	Camillus	1028	2263	1837	1838	Maury	240	53	0	0	0	0	0	53
357	Camillus	1028	2264	1838	1839	Maury	211	37	0	0	0	0	0	37
358	Canada	83	2269	1846	1849	Town	0	45	14	23	7	0	0	0
359	Candace	1029	2275	1836	1838	Maury	477	62	5	0	0	0	0	57
360	Candace	1029	2276	1838	1840	Maury	417	54	3	0	0	0	0	51
361	Candace	1029	2280	1845	1847	CoML	595	115	3	29	0	2	0	81
362	Candace	1029	2280	1845	1847	Maury	471	20	0	0	0	0	0	20
363	Canton	86	2296	1834	1838	Maury	549	53	25	0	0	0	0	28
364	Canton II	87	2304	1845	1847	Town	0	26	3	23	0	0	0	0
365	Canton II	87	2307	1855	1858	Town	0	21	19	2	0	0	0	0
366	Canton II	87	2308	1858	1862	Town	0	45	45	0	0	0	0	0
367	Canton II	87	2309	1862	1866	Town	0	28	27	0	0	1	0	0
368	Canton II	87	2312	1874	1878	Town	0	19	19	0	0	0	0	0
369	Canton II	87	2316	1891	1893	CoML	651	105	40	8	0	6	0	51
370	Canton II	87	2317	1893	1894	Town	0	2	1	0	1	0	0	0
371	Canton II	87	2319	1897	1898	Town	0	17	8	9	0	0	0	0
372	Canton II	87	2320	1899	1900	Town	0	37	36	1	0	0	0	0
373	Canton II	87	2322	1903	1904	Town	0	42	42	0	0	0	0	0
374	Canton II	87	2323	1905	1906	Town	0	44	42	2	0	0	0	0
375	Canton II	87	2324	1907	1909	Town	0	54	44	10	0	0	0	0
376	Canton Packet	88	2329	1845	1849	Town	0	34	33	1	0	0	0	0
377	Canton Packet	88	2330	1849	1853	Town	0	23	7	0	16	0	0	0
378	Canton Packet	88	2332	1857	1861	Town	0	29	29	0	0	0	0	0
379	Cape Horn Pigeon	701	2346	1880	1884	Town	0	73	4	0	0	68	0	0
380	Cape Horn Pigeon	701	2357	1896	1897	Town	0	11	10	1	0	0	0	0
381	Carleton Bell	753	2372	1915	1916	Town	0	26	26	0	0	0	0	0
382	Caroline	84	2391	1842	1846	Maury	645	8	5	3	0	0	0	0
383	Caroline	84	2392	1846	1849	Maury	692	95	8	83	0	0	0	4
384	Caroline	84	2392	1846	1849	Town	0	26	9	17	0	0	0	0
385	Catawba	1052	2450	1840	1843	Maury	872	30	28	0	0	0	0	2
386	Catawba	1052	2452	1848	1852	Town	0	26	26	0	0	0	0	0
387	Catawba	1052	2453	1852	1857	Town	0	36	33	0	0	3	0	0
388	Catharine	1054	2461	1843	1845	Maury	506	57	0	0	0	0	0	57
389	Catherwood	1057	2476	1844	1845	CoML	458	76	24	4	0	7	0	41
390	Catherwood	1057	2478	1845	1847	Town	0	11	10	0	0	1	0	0
391	Cavalier	125	2494	1845	1848	Maury	637	127	0	0	0	0	0	127
392	Cavalier	125	2494	1845	1848	Town	0	14	1	13	0	0	0	0
1457	Cavalier	125	16606	1840	1841	Maury	166	0	0	0	0	0	0	0
393	Ceres	95	2502	1832	1834	Maury	385	83	16	66	0	0	0	1
394	Ceres	95	2502	1832	1834	Town	0	38	8	28	0	0	0	0
395	Ceres	95	2506	1845	1849	Town	0	13	4	9	0	0	0	0
401	Champion	114	2532	1847	1850	Town	0	30	8	12	10	0	0	0
402	Champion	114	2533	1850	1853	Town	0	11	1	0	10	0	0	0
403	Champion	114	2536	1853	1855	Town	0	39	9	1	28	0	0	1
404	Champion	114	2537	1855	1858	Town	0	18	1	0	17	0	0	0
396	Champion	1064	2519	1833	1837	Town	0	44	44	0	0	0	0	0
397	Champion	1064	2520	1838	1841	Maury	771	59	44	0	0	0	0	15
398	Champion	1064	2521	1841	1845	Town	0	13	2	11	0	0	0	0
399	Champion	1064	2522	1845	1848	Maury	789	85	4	0	0	0	0	81
400	Champion	1064	2523	1848	1851	Town	0	20	3	9	7	0	0	1
405	Chanticleer	1067	2561	1852	1852	Maury	138	12	7	0	0	0	0	5
406	Chariot	1068	2575	1844	1847	Maury	90	20	6	0	0	0	0	14
408	Charles	91	2598	1830	1833	Maury	835	64	62	0	0	0	0	2
410	Charles	91	2600	1837	1840	Maury	864	85	85	0	0	0	0	0
409	Charles	91	2600	1837	1840	Town	0	45	45	0	0	0	0	0
411	Charles	91	2603	1841	1844	Town	0	40	40	0	0	0	0	0
412	Charles	91	2604	1845	1849	Town	0	29	29	0	0	0	0	0
407	Charles	702	2590	1809	1811	Maury	209	3	1	2	0	0	0	0
413	Charles and Edward	1073	2620	1858	1860	Town	0	4	4	0	0	0	0	0
414	Charles Carroll	1077	2631	1836	1840	Town	0	50	50	0	0	0	0	0
415	Charles Colgate	1079	2650	1863	1865	Town	0	2	0	2	0	0	0	0
416	Charles Colgate	1079	2651	1865	1867	Town	0	1	0	1	0	0	0	0
417	Charles Colgate	1079	2652	1867	1869	Town	0	2	0	2	0	0	0	0
418	Charles Drew	81	2664	1834	1838	Town	0	11	11	0	0	0	0	0
419	Charles Drew	81	2665	1838	1842	Town	0	32	32	0	0	0	0	0
420	Charles Frederick	90	2675	1846	1850	Town	0	3	3	0	0	0	0	0
421	Charles H. Cook	1081	2678	1866	1867	Town	0	4	4	0	0	0	0	0
422	Charles H. Cook	1081	2679	1867	1868	Town	0	1	1	0	0	0	0	0
425	Charles H. Hodgdon	754	2685	1898	1899	Town	0	8	8	0	0	0	0	0
426	Charles H. Hodgdon	754	2687	1900	1901	Town	0	10	10	0	0	0	0	0
423	Charles H. Hodgdon	754	2683	1894	1896	CoML	570	97	46	0	0	0	0	51
424	Charles H. Hodgdon	754	2683	1894	1896	Town	0	34	34	0	0	0	0	0
427	Charles Henry	1083	2691	1842	1843	Maury	257	42	0	0	0	0	0	42
428	Charles Henry	1083	2692	1843	1845	Maury	258	66	0	0	0	0	0	66
430	Charles Phelps	1085	2695	1842	1844	Maury	338	120	0	0	0	0	0	120
429	Charles Phelps	1085	2695	1842	1844	Town	0	29	3	26	0	0	0	0
431	Charles Phelps	1085	2696	1844	1847	CoML	702	432	14	188	2	20	1	207
432	Charles Phelps	1085	2696	1844	1847	Maury	651	169	0	0	0	0	0	169
433	Charles Phelps	1085	2696	1844	1847	Town	0	21	3	18	0	0	0	0
434	Charles Phelps	1085	2697	1847	1850	Town	0	30	6	16	8	0	0	0
435	Charles Phelps	1085	2698	1850	1853	Town	0	29	5	0	24	0	0	0
436	Charles W. Morgan	89	2712	1841	1845	Maury	892	140	60	14	0	0	0	66
438	Charles W. Morgan	89	2713	1845	1848	Maury	990	89	74	12	0	0	0	3
437	Charles W. Morgan	89	2713	1845	1848	Town	0	38	38	0	0	0	0	0
439	Charles W. Morgan	89	2716	1856	1859	Town	0	2	2	0	0	0	0	0
440	Charles W. Morgan	89	2720	1863	1867	Town	0	19	1	0	12	2	4	0
441	Charles W. Morgan	89	2721	1867	1871	Town	0	28	19	5	0	4	0	0
442	Charles W. Morgan	89	2722	1871	1874	Town	0	2	2	0	0	0	0	0
443	Charles W. Morgan	89	2725	1881	1886	Town	0	18	6	12	0	0	0	0
444	Charles W. Morgan	89	2728	1906	1908	Town	0	19	11	8	0	0	0	0
445	Charles W. Morgan	89	2730	1908	1910	Town	0	40	30	10	0	0	0	0
446	Charles W. Morgan	89	2733	1911	1913	Town	0	52	51	1	0	0	0	0
447	Charles W. Morgan	89	2736	1919	1920	CoML	250	21	15	0	0	0	0	6
448	Charles W. Morgan	89	2744	1893	1895	Town	0	36	29	7	0	0	0	0
449	Charles W. Morgan	89	2746	1896	1897	Town	0	1	0	1	0	0	0	0
450	Charles W. Morgan	89	2750	1900	1901	Town	0	18	14	4	0	0	0	0
451	Charles W. Morgan	89	2752	1902	1903	Town	0	22	22	0	0	0	0	0
452	Charles W. Morgan	89	2753	1903	1904	Town	0	18	16	2	0	0	0	0
453	Charleston Packet	106	2763	1826	1828	CoML	56	27	17	0	0	0	0	8
454	Charleston Packet	106	2765	1835	1837	CoML	406	73	5	5	0	13	0	50
455	Charleston Packet	106	2766	1837	1838	CoML	101	52	5	32	0	6	0	9
456	Charleston Packet	106	2767	1838	1839	CoML	48	12	5	0	0	1	0	6
457	Charleston Packet	106	2770	1840	1841	Town	0	4	4	0	0	0	0	0
458	Charleston Packet	106	2775	1851	1853	Town	0	15	15	0	0	0	0	0
459	Charleston Packet	106	2776	1853	1854	Town	0	2	2	0	0	0	0	0
460	Chase	85	2786	1841	1842	Town	0	15	15	0	0	0	0	0
461	Chase	85	2787	1842	1844	Town	0	7	7	0	0	0	0	0
462	Chase	85	2789	1846	1848	Town	0	12	12	0	0	0	0	0
463	Chase	85	2791	1839	1840	Town	0	12	12	0	0	0	0	0
465	Chelsea	1097	2798	1839	1841	Town	0	36	0	36	0	0	0	0
466	Chelsea	1097	2801	1843	1845	Maury	142	14	0	0	0	0	0	14
464	Chelsea	1097	2794	1834	1836	Town	0	42	38	4	0	0	0	0
467	Cherokee	101	2804	1837	1838	Maury	164	109	4	104	0	0	0	1
468	Cherokee	101	2805	1838	1840	Maury	442	92	22	70	0	0	0	0
469	Cherokee	101	2806	1840	1843	Maury	570	111	33	70	0	0	0	8
470	Cherokee	101	2808	1846	1849	Maury	679	128	19	109	0	0	0	0
471	Cherokee	101	2809	1849	1851	Maury	475	46	3	43	0	0	0	0
472	Chili	107	2830	1836	1837	Town	0	20	3	17	0	0	0	0
473	Chili	107	2832	1839	1843	Town	0	43	42	1	0	0	0	0
474	Chili	107	2833	1843	1845	Town	0	24	5	19	0	0	0	0
475	Chili	107	2834	1845	1848	Maury	779	99	6	12	0	0	0	81
476	Chili	107	2839	1861	1864	Town	0	3	2	0	0	0	0	1
477	China	92	2843	1833	1835	Maury	334	138	21	116	0	0	0	1
479	China	92	2845	1837	1838	Maury	190	37	2	35	0	0	0	0
478	China	92	2845	1837	1838	Town	0	6	4	2	0	0	0	0
480	China	92	2846	1838	1840	Maury	194	54	16	38	0	0	0	0
481	China	92	2847	1840	1842	Maury	499	109	48	59	0	0	0	2
483	China	92	2849	1846	1850	Maury	1222	0	0	0	0	0	0	0
482	China	92	2849	1846	1850	Town	0	42	42	0	0	0	0	0
484	China	92	2855	1865	1868	Town	0	19	5	14	0	0	0	0
485	China	92	2856	1868	1871	Town	0	32	12	20	0	0	0	0
486	Christopher Mitchell	124	2862	1841	1845	Town	0	28	28	0	0	0	0	0
487	Christopher Mitchell	124	2864	1845	1848	Maury	804	93	84	9	0	0	0	0
488	Christopher Mitchell	124	2864	1845	1848	Town	0	36	35	1	0	0	0	0
489	Cicero	96	2883	1856	1860	CoML	1229	165	21	16	4	14	2	108
490	Cicero	96	2883	1856	1860	Town	0	26	6	2	15	0	0	0
491	Cicero	96	2884	1860	1865	CoML	1534	169	12	15	19	16	0	107
492	Cicero	96	2884	1860	1865	Town	0	26	3	1	18	4	0	0
493	Cicero	96	2886	1870	1873	Town	0	36	28	0	0	8	0	0
494	Cincinnati	1102	2890	1845	1849	Town	0	34	7	27	0	0	0	0
495	Citizen	115	2901	1843	1846	Maury	537	154	3	0	0	0	0	151
496	Citizen	115	2902	1846	1849	Maury	368	131	13	0	0	0	0	118
497	Clara L. Sparks	755	2911	1891	1895	Town	0	26	22	0	0	4	0	0
498	Clarice	102	2931	1871	1875	Town	0	21	21	0	0	0	0	0
499	Clarice	102	2932	1875	1878	Town	0	25	25	0	0	0	0	0
500	Clarice	102	2933	1878	1882	Town	0	20	20	0	0	0	0	0
501	Clarice	102	2936	1836	1838	Town	0	3	2	1	0	0	0	0
502	Clarice	102	2937	1838	1841	Town	0	36	36	0	0	0	0	0
503	Clarice	102	2938	1841	1845	Town	0	33	33	0	0	0	0	0
504	Clarice	102	2940	1846	1849	Town	0	6	6	0	0	0	0	0
505	Clarice	102	2944	1863	1866	Town	0	19	18	1	0	0	0	0
506	Clematis	1112	2962	1843	1845	Maury	448	31	0	0	0	0	0	31
507	Clematis	1112	2964	1845	1848	Maury	457	64	0	0	0	0	0	64
508	Clematis	1112	2965	1848	1851	Maury	447	3	2	1	0	0	0	0
509	Cleone	121	2977	1858	1862	Town	0	26	0	5	14	0	7	0
510	Cleone	121	2981	1864	1868	Town	0	27	23	1	2	1	0	0
511	Cleone	121	2982	1868	1872	Town	0	40	13	1	0	26	0	0
512	Clifford Wayne	1114	2993	1837	1840	Maury	461	32	32	0	0	0	0	0
513	Clifford Wayne	1114	2994	1841	1844	Maury	933	48	44	3	0	0	0	1
514	Columbia	1122	3049	1845	1848	Maury	852	1	0	0	0	0	0	1
517	Columbus	110	3086	1836	1839	Town	0	14	14	0	0	0	0	0
518	Columbus	110	3088	1840	1843	Maury	1009	86	85	0	0	0	0	1
519	Columbus	143	3100	1844	1846	Maury	394	36	0	0	0	0	0	36
515	Columbus	1124	3056	1831	1832	Maury	85	68	3	58	0	0	0	7
516	Columbus	1125	3073	1839	1843	Maury	1052	86	68	7	0	0	0	11
520	Commodore Morris	133	3157	1873	1876	Town	0	35	35	0	0	0	0	0
521	Concordia	1140	3205	1843	1845	Maury	487	0	0	0	0	0	0	0
522	Condor	104	3221	1833	1834	Town	0	27	3	24	0	0	0	0
523	Condor	104	3223	1835	1837	Town	0	46	2	44	0	0	0	0
524	Condor	104	3224	1837	1839	Town	0	26	1	25	0	0	0	0
525	Condor	104	3225	1839	1841	Town	0	32	11	21	0	0	0	0
526	Condor	104	3226	1841	1844	Maury	518	144	7	136	0	0	0	1
527	Condor	104	3227	1844	1846	Town	0	33	4	29	0	0	0	0
528	Condor	104	3230	1850	1853	Town	0	23	8	4	11	0	0	0
529	Congaree	118	3234	1846	1850	Town	0	39	39	0	0	0	0	0
530	Congaree	118	3235	1851	1855	Town	0	25	25	0	0	0	0	0
531	Congress	112	3248	1846	1848	Maury	623	70	26	38	0	0	0	6
532	Congress II	113	3257	1855	1858	Town	0	11	1	9	0	1	0	0
533	Connecticut	1144	3263	1827	1830	Maury	643	71	0	0	0	0	0	71
534	Connecticut	1144	3264	1830	1831	Maury	233	42	0	0	0	0	0	42
535	Copia	94	3306	1845	1848	Town	0	22	1	21	0	0	0	0
536	Coral	109	3317	1839	1842	Maury	930	95	94	0	0	0	0	1
537	Coral	109	3318	1842	1846	Maury	966	110	61	47	0	0	0	2
538	Coral	109	3319	1846	1850	Maury	1035	90	89	1	0	0	0	0
539	Coral	109	3319	1846	1850	Town	0	50	50	0	0	0	0	0
540	Coral	109	3335	1886	1887	CoML	222	77	5	30	0	7	0	34
541	Coral	109	3336	1887	1888	CoML	177	86	0	34	0	5	0	47
542	Coral	109	3337	1888	1889	CoML	111	82	0	25	0	13	0	44
543	Corinthian	97	3350	1831	1835	Maury	533	62	62	0	0	0	0	0
544	Corinthian	97	3351	1835	1839	Maury	888	127	97	6	0	0	0	24
545	Corinthian	97	3354	1847	1851	Town	0	16	16	0	0	0	0	0
546	Corinthian	97	3357	1858	1862	Town	0	24	3	13	8	0	0	0
547	Corinthian	97	3358	1862	1866	Town	0	29	3	0	26	0	0	0
548	Corinthian	97	3359	1866	1868	Town	0	19	0	0	17	0	2	0
549	Coriolanus	1154	3365	1844	1847	Maury	54	0	0	0	0	0	0	0
550	Cornelia	105	3387	1846	1848	Town	0	17	16	1	0	0	0	0
551	Cornelia	105	3390	1853	1857	Town	0	25	7	7	0	10	0	1
552	Cornelia	105	3392	1861	1864	Town	0	2	2	0	0	0	0	0
553	Cornelia	105	3396	1871	1874	Town	0	7	7	0	0	0	0	0
554	Cornelius Howland	103	3407	1867	1871	Town	0	38	3	0	29	4	2	0
555	Cortes	98	3409	1828	1830	Maury	751	47	44	0	0	0	0	3
556	Cortes	98	3412	1838	1842	Maury	378	40	38	2	0	0	0	0
557	Cortes	98	3413	1842	1846	Maury	1222	70	69	0	0	0	0	1
558	Cortes	98	3413	1842	1846	Town	0	29	29	0	0	0	0	0
559	Cossack	122	3425	1850	1853	Town	0	12	1	0	10	0	1	0
560	Cossack	122	3427	1857	1861	Town	0	28	0	2	3	23	0	0
561	Courier	99	3451	1842	1846	Maury	790	131	20	7	0	0	0	103
562	Covington	1165	3468	1843	1846	Maury	149	2	0	0	0	0	0	2
563	Cowper	117	3474	1845	1848	Town	0	27	3	24	0	0	0	0
564	Crescent	1168	3489	1843	1846	Maury	737	96	0	0	0	0	0	96
565	Daniel Webster	160	3567	1848	1852	Town	0	17	9	1	7	0	0	0
566	Daniel Webster	160	3571	1863	1864	Town	0	11	0	0	11	0	0	0
567	Daniel Webster	160	3574	1877	1880	Town	0	16	10	6	0	0	0	0
569	Daniel Webster	1187	3576	1833	1837	Maury	30	0	0	0	0	0	0	0
568	Daniel Webster	1187	3576	1833	1837	Town	0	53	53	0	0	0	0	0
570	Daniel Webster	1187	3583	1845	1848	Maury	843	55	0	0	0	0	0	55
571	Daniel Wood	159	3584	1852	1856	Town	0	32	5	0	27	0	0	0
572	Daniel Wood	159	3585	1856	1860	Town	0	26	1	0	25	0	0	0
573	Daniel Wood	159	3586	1860	1864	Town	0	24	21	3	0	0	0	0
574	Dartmouth	145	3595	1844	1847	Maury	713	113	24	87	0	0	0	2
575	David A. Small	1191	3621	1875	1876	CoML	27	50	23	0	0	3	0	24
576	David A. Small	1191	3621	1875	1876	Town	0	14	14	0	0	0	0	0
577	Delight	158	3676	1839	1840	Town	0	4	4	0	0	0	0	0
578	Delphos	1202	3683	1843	1845	Town	0	23	4	19	0	0	0	0
579	Desdemona	146	3713	1865	1869	Town	0	16	15	1	0	0	0	0
580	Desdemona	146	3714	1869	1872	Town	0	17	13	4	0	0	0	0
581	Desdemona	146	3716	1876	1879	Town	0	39	11	5	0	23	0	0
582	Desdemona	146	3718	1894	1895	Town	0	9	9	0	0	0	0	0
583	Desdemona	146	3722	1835	1837	Town	0	21	2	19	0	0	0	0
585	Dimon	150	3769	1845	1848	Maury	812	24	1	0	0	0	0	23
584	Dimon	150	3769	1845	1848	Town	0	25	25	0	0	0	0	0
586	Dolphin	1222	3790	1850	1853	Maury	423	0	0	0	0	0	0	0
587	Dove	1228	3814	1842	1844	Maury	465	46	6	0	0	0	0	40
588	Dove	1228	3817	1849	1851	Maury	197	11	4	6	0	0	0	1
589	Dove	1228	3819	1851	1854	Maury	716	23	18	4	0	0	0	1
592	Draco	148	3829	1843	1847	CoML	876	253	77	0	0	4	0	169
590	Draco	148	3829	1843	1847	Maury	944	66	65	1	0	0	0	0
591	Draco	148	3829	1843	1847	Town	0	27	27	0	0	0	0	0
593	Draco	148	3830	1847	1850	Maury	941	55	51	3	0	0	0	1
594	Draco	148	3831	1851	1854	Town	0	19	19	0	0	0	0	0
595	Draco	148	3835	1866	1868	Town	0	17	17	0	0	0	0	0
596	Draco	148	3837	1872	1875	Town	0	41	22	0	0	19	0	0
597	Draco	148	3839	1878	1880	Town	0	21	8	2	0	11	0	0
598	Draper	147	3855	1847	1851	Maury	900	34	28	3	0	0	0	3
599	Dromo	1232	3864	1844	1847	Maury	470	27	0	0	0	0	0	27
600	Dromo	1233	3870	1845	1848	Maury	674	66	32	0	0	0	0	34
601	Dryade	149	3878	1844	1847	Town	0	21	8	13	0	0	0	0
602	E. Corning	191	3910	1855	1860	Town	0	6	6	0	0	0	0	0
603	E. H. Hatfield	1236	3914	1880	1880	Town	0	3	3	0	0	0	0	0
604	E. H. Hatfield	1236	3915	1880	1882	Town	0	8	7	0	0	1	0	0
605	E. H. Hatfield	1236	3919	1861	1862	Town	0	9	3	0	0	6	0	0
606	E. H. Hatfield	1236	3924	1867	1868	Town	0	3	3	0	0	0	0	0
608	E. H. Hatfield	1236	3931	1876	1876	CoML	38	11	1	0	0	0	0	10
607	E. H. Hatfield	1236	3931	1876	1876	Town	0	6	6	0	0	0	0	0
609	E. H. Hatfield	1236	3932	1876	1878	Town	0	9	8	0	0	1	0	0
610	E. Nickerson	1238	3937	1850	1851	Town	0	8	6	0	0	2	0	0
611	Eagle	177	3977	1840	1844	Town	0	25	6	19	0	0	0	0
612	Eagle	177	3984	1865	1869	Town	0	40	0	5	11	1	22	1
613	Edith May	1248	3998	1867	1869	Town	0	2	2	0	0	0	0	0
616	Edward	1252	4025	1860	1864	Town	0	9	9	0	0	0	0	0
621	Edward	1252	4038	1846	1849	Maury	813	63	61	1	0	0	0	1
614	Edward	1254	4009	1815	1817	Town	0	4	4	0	0	0	0	0
615	Edward	1254	4010	1817	1817	Town	0	1	1	0	0	0	0	0
617	Edward Cary	1249	4031	1854	1858	Town	0	23	23	0	0	0	0	0
618	Edward Cary	1249	4032	1858	1864	Town	0	53	21	0	0	32	0	0
619	Edward Everett	197	4034	1867	1869	Town	0	4	4	0	0	0	0	0
620	Edward Everett	197	4036	1873	1875	Town	0	10	10	0	0	0	0	0
622	Edward Quesnel	1251	4049	1836	1839	CoML	637	260	64	45	0	21	0	129
623	Elbe	1257	4055	1838	1840	Maury	391	225	2	0	0	0	0	223
624	Eleanor B. Conwell	430	4069	1880	1882	Town	0	15	14	0	0	0	0	1
625	Eleanor B. Conwell	430	4070	1883	1884	Town	0	14	13	0	0	0	0	1
626	Eleanor B. Conwell	430	4071	1884	1885	Town	0	1	1	0	0	0	0	0
627	Eleanor B. Conwell	430	4072	1885	1885	Town	0	6	6	0	0	0	0	0
628	Eleanor B. Conwell	430	4073	1885	1887	Town	0	16	16	0	0	0	0	0
629	Eleanor B. Conwell	430	4074	1887	1888	Town	0	8	8	0	0	0	0	0
630	Eleanor B. Conwell	430	4075	1889	1890	Town	0	22	22	0	0	0	0	0
631	Eleanor B. Conwell	430	4076	1890	1892	CoML	16	1	1	0	0	0	0	0
632	Eleanor B. Conwell	430	4076	1890	1892	Town	0	33	33	0	0	0	0	0
633	Eleanor B. Conwell	430	4085	1906	1906	Town	0	9	9	0	0	0	0	0
634	Eleanor B. Conwell	430	4086	1906	1907	Town	0	7	7	0	0	0	0	0
635	Eleanor B. Conwell	430	4087	1907	1907	Town	0	9	9	0	0	0	0	0
636	Electra	1261	4120	1862	1863	Town	0	3	1	2	0	0	0	0
638	Eliza	193	4143	1865	1869	CoML	1282	119	54	18	0	1	0	46
639	Eliza	193	4144	1869	1873	Town	0	25	23	2	0	0	0	0
637	Eliza	1267	4128	1838	1840	Town	0	24	6	18	0	0	0	0
640	Eliza Adams	199	4166	1835	1838	Maury	747	103	61	2	0	0	0	40
641	Eliza Adams	199	4166	1835	1838	Town	0	55	55	0	0	0	0	0
642	Eliza Adams	199	4169	1846	1849	Town	0	32	3	29	0	0	0	0
643	Eliza Adams	199	4176	1867	1871	Town	0	38	22	16	0	0	0	0
644	Eliza Adams	199	4177	1872	1876	Town	0	24	22	1	0	1	0	0
645	Eliza Adams	199	4178	1876	1878	Town	0	13	13	0	0	0	0	0
646	Eliza Adams	199	4179	1879	1883	Town	0	35	25	6	0	4	0	0
647	Eliza F. Mason	189	4190	1853	1857	Maury	630	99	5	26	0	0	0	68
648	Eliza L. B. Jenney	1265	4195	1842	1846	Maury	1060	65	65	0	0	0	0	0
656	Elizabeth	155	4222	1831	1832	Town	0	21	1	20	0	0	0	0
649	Elizabeth	172	4200	1837	1841	Maury	859	92	0	0	0	0	0	91
650	Elizabeth	172	4200	1837	1841	Town	0	40	40	0	0	0	0	0
657	Elizabeth	172	4226	1841	1844	Maury	614	56	2	0	0	0	0	54
658	Elizabeth	172	4227	1844	1847	Town	0	30	15	13	0	2	0	0
659	Elizabeth	172	4231	1851	1855	Town	0	42	42	0	0	0	0	0
660	Elizabeth	203	4243	1837	1838	CoML	242	32	12	0	0	2	0	18
661	Elizabeth	203	4245	1839	1840	CoML	286	37	9	0	0	0	0	28
662	Elizabeth	203	4246	1840	1840	CoML	109	16	6	0	0	0	0	10
663	Elizabeth	203	4247	1841	1841	CoML	11	0	0	0	0	0	0	0
664	Elizabeth	203	4248	1841	1842	CoML	297	60	8	0	0	1	0	51
651	Elizabeth	1278	4201	1841	1844	Town	0	33	33	0	0	0	0	0
652	Elizabeth	1279	4205	1844	1846	Town	0	12	10	2	0	0	0	0
653	Elizabeth	1279	4207	1846	1848	CoML	465	71	38	1	0	6	0	26
654	Elizabeth	1279	4207	1846	1848	Town	0	12	10	1	0	1	0	0
655	Elizabeth	1279	4209	1849	1850	Town	0	15	15	0	0	0	0	0
665	Elizabeth Frith	1273	4259	1848	1850	Town	0	16	3	2	11	0	0	0
666	Elizabeth Swift	190	4267	1859	1863	Town	0	27	26	1	0	0	0	0
667	Elizabeth Swift	190	4268	1863	1868	Town	0	47	3	0	35	9	0	0
668	Ellen	1283	4270	1852	1856	Town	0	31	27	0	4	0	0	0
669	Ellen A. Swift	757	4294	1912	1912	Town	0	19	19	0	0	0	0	0
1458	Emeline	1286	16607	1844	1845	Maury	59	6	3	0	0	0	0	3
670	Emerald	178	4361	1833	1834	Maury	101	81	1	2	0	0	0	78
671	Emerald	178	4363	1835	1837	Town	0	43	0	42	0	1	0	0
672	Emerald	178	4367	1843	1847	Town	0	24	23	1	0	0	0	0
673	Emerald	178	4368	1847	1851	Maury	1068	54	50	0	0	0	0	4
674	Emerald	1291	4377	1838	1840	Town	0	24	6	18	0	0	0	0
675	Emerald	1291	4378	1840	1843	Maury	792	42	0	0	0	0	0	42
676	Emerald	1291	4378	1840	1843	Town	0	30	12	18	0	0	0	0
677	Emerald	1291	4380	1843	1845	Town	0	22	22	0	0	0	0	0
678	Emigrant	182	4389	1844	1847	Town	0	8	6	2	0	0	0	0
679	Emily Morgan	170	4402	1842	1846	Maury	306	44	7	37	0	0	0	0
680	Emily Morgan	170	4402	1842	1846	Town	0	47	43	4	0	0	0	0
681	Emily Morgan	170	4407	1863	1868	Town	0	36	17	16	3	0	0	0
682	Emily Morgan	170	4409	1868	1871	Town	0	14	5	1	4	0	4	0
683	Emma C. Jones	208	4420	1849	1852	Town	0	34	15	19	0	0	0	0
684	Emma C. Jones	208	4423	1858	1860	Town	0	7	2	5	0	0	0	0
685	Emma C. Jones	208	4427	1875	1879	Town	0	40	40	0	0	0	0	0
686	Emma Jane	1297	4446	1879	1881	Town	0	27	26	1	0	0	0	0
687	Emma Jane	1297	4447	1881	1881	Town	0	4	4	0	0	0	0	0
688	Emma Jane	1297	4448	1882	1883	Town	0	18	18	0	0	0	0	0
689	Emma Jane	1297	4449	1883	1884	Town	0	8	8	0	0	0	0	0
690	Empire	187	4456	1843	1847	Town	0	46	46	0	0	0	0	0
691	Endeavor	173	4483	1841	1843	Town	0	22	15	7	0	0	0	0
692	Endeavor	173	4488	1854	1857	Town	0	16	2	3	11	0	0	0
696	Enterprise	174	4518	1831	1834	Maury	786	81	77	3	0	0	0	1
693	Enterprise	1307	4509	1836	1840	Town	0	35	35	0	0	0	0	0
694	Enterprise	1307	4510	1840	1844	Town	0	22	3	19	0	0	0	0
695	Enterprise	1307	4514	1854	1858	Town	0	7	1	6	0	0	0	0
697	Equator	179	4546	1828	1831	Town	0	40	40	0	0	0	0	0
698	Equator	179	4550	1839	1843	Town	0	17	17	0	0	0	0	0
699	Equator	179	4551	1843	1847	Town	0	26	26	0	0	0	0	0
700	Era	712	4554	1895	1896	Town	0	3	0	0	3	0	0	0
701	Era	712	4555	1897	1899	Town	0	7	0	0	7	0	0	0
702	Era	712	4556	1900	1902	Town	0	9	0	0	9	0	0	0
703	Era	712	4557	1903	1905	Town	0	7	0	0	7	0	0	0
705	Erie	2753	4582	1847	1850	CoML	756	252	17	122	14	18	0	81
704	Erie	2753	4582	1847	1850	Town	0	29	2	13	14	0	0	0
706	Erie	2753	4583	1850	1853	Town	0	19	1	0	18	0	0	0
707	Eugenia	198	4652	1851	1855	Town	0	37	31	0	0	6	0	0
708	Eugenia	198	4654	1855	1859	Town	0	27	23	4	0	0	0	0
709	Eugenia	198	4655	1859	1864	Town	0	23	23	0	0	0	0	0
710	Eugenia	198	4656	1865	1869	Town	0	24	7	4	12	0	1	0
711	Eugenia	198	4660	1869	1871	Town	0	10	2	0	7	0	0	1
712	Eunice H. Adams	200	4661	1884	1884	Town	0	2	2	0	0	0	0	0
713	Eunice H. Adams	200	4662	1884	1885	Town	0	5	5	0	0	0	0	0
714	Eunice H. Adams	200	4664	1885	1887	Town	0	31	29	0	0	2	0	0
715	Eunice H. Adams	200	4665	1887	1890	Town	0	11	11	0	0	0	0	0
716	Eunice H. Adams	200	4667	1893	1894	Town	0	16	16	0	0	0	0	0
718	Euphrates	175	4685	1849	1851	Maury	411	68	1	62	0	0	0	5
719	Euphrates	175	4687	1854	1857	Town	0	39	4	1	33	0	1	0
720	Euphrates	175	4688	1857	1861	CoML	1159	122	5	1	3	8	3	102
721	Euphrates	175	4688	1857	1861	Town	0	27	1	0	25	0	1	0
717	Euphrates	175	4684	1846	1849	Town	0	27	1	26	0	0	0	0
724	Europa	185	4701	1867	1871	Town	0	62	15	0	0	47	0	0
725	Europa	185	4702	1871	1876	CoML	1447	142	4	1	60	3	0	74
726	Europa	185	4702	1871	1876	Town	0	5	0	0	5	0	0	0
727	Europa	185	4705	1884	1885	Town	0	17	1	15	0	0	0	1
723	Europa	1328	4694	1866	1872	CoML	1104	392	11	37	51	61	55	177
722	Europa	1328	4694	1866	1872	Town	0	38	7	2	18	5	5	1
728	Exchange	181	4726	1847	1849	CoML	559	189	24	0	0	12	0	153
729	Exchange	181	4726	1847	1849	Town	0	10	8	0	0	1	0	1
730	Exchange	181	4737	1844	1846	Town	0	11	11	0	0	0	0	0
731	Exile	1333	4741	1848	1852	Town	0	12	0	8	0	4	0	0
732	Express	1335	4757	1878	1878	Town	0	6	1	0	0	5	0	0
733	F. H. Moore	441	4770	1873	1875	CoML	36	16	10	0	0	0	0	6
734	Fabius	222	4780	1846	1849	Maury	613	141	2	101	0	0	0	38
735	Fabius	222	4782	1851	1854	Maury	638	117	9	9	0	0	0	99
736	Fabius	222	4784	1857	1862	Town	0	61	9	4	15	0	33	0
737	Fabius	222	4785	1862	1865	Town	0	22	4	0	8	7	3	0
738	Factor	221	4793	1844	1847	Maury	252	60	3	57	0	0	0	0
739	Fair Helen	1342	4804	1824	1825	Town	0	22	2	20	0	0	0	0
740	Fair Helen	1342	4805	1825	1826	Town	0	17	1	16	0	0	0	0
741	Fairy	1345	4814	1843	1844	CoML	291	134	14	0	0	4	0	116
742	Fairy	1345	4815	1845	1846	Town	0	14	13	0	0	1	0	0
743	Falcon	211	4823	1832	1833	Maury	113	64	1	63	0	0	0	0
744	Falcon	211	4826	1836	1838	Town	0	47	14	33	0	0	0	0
745	Falcon	211	4829	1843	1846	Maury	695	114	8	13	0	0	0	92
746	Falcon	211	4830	1846	1849	Town	0	22	0	22	0	0	0	0
747	Falcon	211	4832	1852	1855	Town	0	6	3	0	3	0	0	0
748	Falcon	211	4840	1875	1879	Town	0	25	21	0	0	4	0	0
749	Fanny	1361	4886	1852	1856	Town	0	60	1	0	59	0	0	0
750	Fanny	1361	4887	1856	1860	Town	0	44	2	0	42	0	0	0
751	Fanny	1361	4888	1860	1864	Town	0	33	10	0	23	0	0	0
752	Fanny	1361	4889	1864	1869	Town	0	43	5	5	17	14	1	1
753	Fanny	1361	4890	1869	1871	Town	0	15	0	0	15	0	0	0
755	Favorite	228	4904	1835	1837	Maury	435	49	18	31	0	0	0	0
754	Favorite	228	4904	1835	1837	Town	0	15	5	10	0	0	0	0
756	Favorite	228	4911	1853	1857	Town	0	8	1	6	1	0	0	0
757	Fellowes	1367	4931	1845	1850	Town	0	12	2	0	10	0	0	0
758	Fenelon	212	4935	1837	1838	Town	0	24	1	23	0	0	0	0
759	Fenelon	212	4937	1840	1842	Town	0	44	5	39	0	0	0	0
760	Fenelon	212	4938	1842	1844	Town	0	40	5	35	0	0	0	0
761	Fleetwing	434	4952	1885	1886	Town	0	3	0	0	3	0	0	0
762	Flora	1369	4964	1835	1836	CoML	251	65	15	0	0	5	0	45
763	Flora	1369	4969	1841	1843	Maury	580	87	22	64	0	0	0	1
764	Florida	213	4998	1843	1846	Town	0	22	6	16	0	0	0	0
765	Florida	213	5004	1859	1863	Town	0	36	2	2	22	8	1	1
766	Fortune	224	5037	1847	1850	Town	0	21	0	17	4	0	0	0
767	Fortune	224	5038	1850	1854	CoML	1108	222	5	3	8	7	8	190
768	Fortune	224	5038	1850	1854	Town	0	37	3	0	34	0	0	0
769	Frances	215	5088	1830	1832	Town	0	45	45	0	0	0	0	0
770	Frances	215	5093	1843	1847	CoML	1011	239	42	1	0	7	0	181
771	Frances A. Barstow	443	5118	1891	1892	Town	0	8	2	1	5	0	0	0
772	Frances Henrietta	217	5127	1835	1836	Town	0	10	3	7	0	0	0	0
773	Frances Henrietta	217	5130	1843	1845	Town	0	14	5	9	0	0	0	0
774	Frances Henrietta	217	5131	1845	1848	Maury	674	144	15	119	0	0	0	10
775	Francis Allyn	758	5167	1889	1890	Town	0	5	5	0	0	0	0	0
776	Francis Allyn	758	5169	1891	1893	CoML	479	8	1	0	0	3	0	3
779	Frank Bunchinia	1401	5195	1856	1858	Town	0	6	5	0	0	1	0	0
778	Frank Bunchinia	1401	5193	1852	1854	CoML	218	65	9	0	0	1	0	55
777	Frank Bunchinia	1401	5193	1852	1854	Town	0	22	7	0	0	15	0	0
781	Franklin	219	5231	1853	1857	Town	0	8	3	0	5	0	0	0
782	Franklin	1406	5235	1878	1879	Town	0	1	0	0	1	0	0	0
783	Franklin	1406	5236	1880	1881	Town	0	2	2	0	0	0	0	0
784	Franklin	1406	5238	1883	1885	CoML	528	169	30	0	0	0	0	139
785	Franklin	1406	5240	1885	1887	Town	0	18	11	0	0	7	0	0
786	Franklin	1406	5242	1889	1891	Town	0	37	37	0	0	0	0	0
787	Franklin	1406	5252	1863	1864	Town	0	11	8	3	0	0	0	0
788	Franklin	1407	5271	1852	1852	Town	0	8	8	0	0	0	0	0
780	Franklin	2824	5201	1819	1821	Maury	42	1	0	0	0	0	0	1
789	Gage H. Phillips	1424	5346	1875	1877	Town	0	11	11	0	0	0	0	0
790	Gage H. Phillips	1424	5347	1878	1880	Town	0	21	21	0	0	0	0	0
791	Gage H. Phillips	1424	5348	1881	1883	Town	0	7	7	0	0	0	0	0
792	Galatea	262	5358	1827	1828	CoML	290	137	6	11	0	2	0	118
793	Ganges	1428	5380	1832	1835	Maury	60	0	0	0	0	0	0	0
794	Garland	233	5392	1838	1840	Maury	396	38	12	24	0	0	0	2
795	Garland	233	5394	1842	1845	Town	0	21	10	8	3	0	0	0
796	Garland	233	5396	1849	1851	Maury	156	1	1	0	0	0	0	0
797	Gay Head	253	5402	1852	1856	Town	0	34	34	0	0	0	0	0
798	Gay Head	253	5406	1870	1871	Town	0	8	4	0	4	0	0	0
799	Gay Head II	265	5407	1877	1881	Town	0	20	13	6	0	1	0	0
800	Gay Head II	265	5410	1882	1887	Town	0	57	19	0	0	38	0	0
801	Gay Head II	265	5411	1888	1892	Town	0	15	14	1	0	0	0	0
802	Gazelle	254	5436	1866	1870	Town	0	3	3	0	0	0	0	0
803	General Pike	235	5494	1845	1849	Town	0	16	16	0	0	0	0	0
805	General Scott	263	5509	1855	1858	Town	0	41	17	4	20	0	0	0
804	General Scott	1441	5507	1847	1851	Town	0	9	9	0	0	0	0	0
806	General Scott	1441	5516	1875	1878	Town	0	21	19	0	0	2	0	0
807	General Williams	1445	5528	1843	1845	Maury	142	2	0	0	0	0	0	2
808	George	234	5567	1832	1835	Maury	793	89	88	1	0	0	0	0
809	George	234	5572	1843	1847	Town	0	34	30	4	0	0	0	0
810	George	234	5576	1862	1864	Town	0	12	12	0	0	0	0	0
811	George	234	5578	1865	1869	Town	0	2	2	0	0	0	0	0
812	George and Martha	240	5597	1821	1822	Maury	210	59	2	50	0	0	0	7
813	George and Martha	240	5597	1821	1822	Town	0	32	2	30	0	0	0	0
814	George and Martha	240	5598	1822	1823	Maury	252	54	4	45	0	0	0	5
815	George and Martha	240	5600	1824	1825	Maury	258	64	2	38	0	0	0	24
816	George and Martha	240	5602	1826	1827	Town	0	33	5	28	0	0	0	0
817	George and Martha	240	5603	1827	1828	Town	0	29	1	28	0	0	0	0
820	George and Mary	259	5620	1877	1879	Town	0	15	14	0	0	1	0	0
821	George and Mary	259	5622	1881	1882	Town	0	3	0	0	3	0	0	0
822	George and Mary	259	5623	1883	1884	Town	0	3	0	0	3	0	0	0
823	George and Mary	259	5625	1888	1891	Town	0	40	40	0	0	0	0	0
824	George and Mary	259	5626	1892	1894	Town	0	33	33	0	0	0	0	0
818	George and Mary	1450	5617	1835	1839	Maury	730	117	117	0	0	0	0	0
819	George and Mary	1450	5618	1839	1843	Maury	1091	87	85	2	0	0	0	0
825	George and Susan	239	5647	1817	1818	Maury	255	64	0	24	0	0	0	40
826	George and Susan	239	5656	1833	1837	Town	0	45	45	0	0	0	0	0
827	George and Susan	239	5657	1837	1841	Town	0	60	60	0	0	0	0	0
828	George and Susan	239	5660	1845	1848	Maury	662	175	11	164	0	0	0	0
829	George and Susan	239	5660	1845	1848	Town	0	31	4	27	0	0	0	0
830	George and Susan	239	5661	1848	1852	Town	0	30	20	1	9	0	0	0
831	George and Susan	239	5662	1852	1857	Town	0	20	20	0	0	0	0	0
832	George and Susan	239	5663	1857	1861	Town	0	26	8	13	2	3	0	0
833	George and Susan	239	5665	1861	1864	Town	0	23	12	11	0	0	0	0
834	George and Susan	239	5666	1865	1868	Town	0	32	20	11	0	1	0	0
835	George and Susan	239	5667	1868	1871	Town	0	11	6	5	0	0	0	0
836	George and Susan	239	5671	1874	1877	Town	0	50	22	0	0	27	0	1
837	George and Susan	239	5672	1877	1881	Town	0	4	1	3	0	0	0	0
838	George Champlin	1454	5681	1839	1843	Maury	1036	89	11	3	0	0	0	75
839	George Howland	236	5689	1834	1838	CoML	768	482	98	1	0	26	0	357
840	George Howland	236	5693	1850	1852	Town	0	7	6	1	0	0	0	0
841	George Howland	236	5694	1852	1857	Town	0	29	14	3	12	0	0	0
842	George Howland	236	5695	1857	1861	Town	0	25	1	10	8	0	6	0
843	George Howland	236	5696	1862	1866	Town	0	29	5	2	7	0	15	0
844	George Howland	236	5697	1866	1870	Town	0	34	1	0	19	1	13	0
845	George Porter	241	5704	1827	1828	Town	0	22	2	20	0	0	0	0
847	George Porter	241	5712	1835	1836	Maury	146	47	0	47	0	0	0	0
846	George Porter	241	5712	1835	1836	Town	0	11	0	11	0	0	0	0
848	George Porter	241	5716	1843	1847	Maury	408	116	24	0	0	0	0	92
849	George Porter	241	5717	1848	1850	Town	0	14	14	0	0	0	0	0
850	George W. Lewis	1458	5718	1861	1862	CoML	35	6	1	0	0	0	0	5
851	George W. Lewis	1458	5719	1862	1863	CoML	31	22	4	0	0	0	0	17
852	George W. Lewis	1458	5720	1864	1865	CoML	11	1	0	0	0	0	0	1
853	George Washington	242	5726	1838	1840	Town	0	5	1	4	0	0	0	0
854	George Washington	242	5729	1841	1842	CoML	540	92	16	0	0	17	0	59
855	George Washington	242	5731	1845	1848	Maury	637	70	58	6	0	0	0	6
856	George Washington	1461	5739	1845	1848	Maury	276	59	2	0	0	0	0	57
857	George Washington	2735	5742	1840	1844	Maury	880	92	86	6	0	0	0	0
858	George Washington	2735	5742	1840	1844	Town	0	47	47	0	0	0	0	0
859	George Washington	2735	5747	1857	1861	Town	0	4	0	0	4	0	0	0
861	Georgia	1468	5749	1833	1835	Maury	527	67	6	0	0	0	0	61
860	Georgia	1468	5749	1833	1835	Town	0	34	16	18	0	0	0	0
862	Georgia	1468	5752	1838	1839	Maury	184	5	2	0	0	0	0	3
863	Georgia	1468	5753	1839	1841	Maury	470	41	13	0	0	0	0	28
864	Georgia	1468	5756	1843	1846	Maury	723	118	8	0	0	0	0	110
865	Gideon Howland	238	5776	1831	1834	Maury	878	132	63	0	0	0	0	69
866	Gideon Howland	238	5783	1857	1861	Town	0	37	3	8	18	0	8	0
867	Glacier	256	5785	1864	1865	Town	0	13	1	0	12	0	0	0
868	Glacier	256	5786	1866	1867	CoML	510	37	2	0	25	0	0	10
869	Glacier	256	5788	1871	1873	Town	0	2	0	0	2	0	0	0
870	Globe	250	5808	1850	1855	Town	0	15	1	0	14	0	0	0
871	Globe	250	5813	1869	1872	Town	0	38	11	0	0	27	0	0
872	Golconda	244	5822	1836	1839	Town	0	31	5	26	0	0	0	0
873	Golconda	244	5825	1847	1851	Town	0	24	23	0	0	1	0	0
874	Golconda	244	5829	1859	1864	Town	0	2	2	0	0	0	0	0
875	Golconda II	245	5833	1841	1844	Maury	834	127	27	100	0	0	0	0
877	Golden City	264	5845	1875	1876	CoML	34	17	15	0	0	0	0	1
876	Golden City	264	5845	1875	1876	Town	0	10	10	0	0	0	0	0
878	Golden City	264	5847	1878	1880	Town	0	11	11	0	0	0	0	0
879	Golden City	264	5848	1880	1881	Town	0	15	15	0	0	0	0	0
880	Golden City	264	5850	1881	1882	Town	0	4	3	1	0	0	0	0
881	Golden City	264	5851	1882	1884	CoML	42	56	17	0	0	11	0	28
882	Golden City	264	5851	1882	1884	Town	0	13	10	0	0	3	0	0
883	Golden City	264	5853	1888	1889	Town	0	22	22	0	0	0	0	0
884	Golden City	264	5854	1889	1891	Town	0	27	27	0	0	0	0	0
885	Golden City	264	5861	1901	1903	Town	0	26	26	0	0	0	0	0
886	Golden City	264	5863	1903	1904	Town	0	13	13	0	0	0	0	0
887	Golden City	264	5864	1904	1905	Town	0	16	16	0	0	0	0	0
888	Good Return II	218	5893	1828	1829	Town	0	22	6	16	0	0	0	0
889	Good Return II	218	5894	1829	1830	Town	0	11	2	9	0	0	0	0
890	Good Return II	218	5895	1830	1833	Town	0	40	8	32	0	0	0	0
891	Good Return II	218	5896	1833	1834	Town	0	32	1	31	0	0	0	0
892	Good Return II	218	5898	1836	1838	Town	0	14	13	0	0	0	0	0
893	Good Return II	218	5901	1844	1847	Town	0	31	5	26	0	0	0	0
894	Good Return II	218	5902	1847	1851	Town	0	30	9	16	4	1	0	0
896	Good Return II	218	5903	1851	1855	CoML	1075	304	5	15	65	3	6	209
895	Good Return II	218	5903	1851	1855	Town	0	42	3	1	37	1	0	0
897	Good Return II	218	5904	1855	1858	Town	0	34	4	29	0	1	0	0
898	Governor Carver	1488	5918	1857	1860	Town	0	9	9	0	0	0	0	0
899	Governor Hopkins	1493	5936	1839	1840	Town	0	4	4	0	0	0	0	0
900	Governor Strong	1494	5945	1817	1819	Town	0	28	21	6	0	1	0	0
901	Governor Troup	247	5952	1853	1856	CoML	800	155	5	15	33	5	5	92
902	Governor Troup	247	5954	1859	1862	Town	0	3	2	1	0	0	0	0
903	Governor Troup	247	5955	1862	1867	Town	0	32	2	1	20	1	8	0
904	Governor Troup	247	5956	1868	1872	Town	0	33	17	3	0	13	0	0
905	Grampus	1502	5979	1888	1888	Town	0	3	0	0	3	0	0	0
906	Grampus	1502	5980	1889	1889	Town	0	2	0	0	2	0	0	0
907	Grand Turk	260	5997	1834	1836	Town	0	61	4	20	0	36	0	1
908	Grand Turk	260	5998	1836	1838	Town	0	44	3	41	0	0	0	0
909	Gratitude	248	6007	1848	1851	Town	0	32	3	14	15	0	0	0
910	Gratitude	248	6008	1851	1854	Town	0	16	2	1	13	0	0	0
911	Gratitude	248	6009	1854	1858	Town	0	2	0	0	2	0	0	0
912	Gratitude	248	6010	1858	1862	Town	0	39	10	5	23	0	1	0
913	Greyhound	257	6016	1866	1871	Town	0	19	19	0	0	0	0	0
914	Greyhound	258	6018	1879	1883	Town	0	21	5	0	0	16	0	0
915	Greyhound	258	6019	1885	1887	Town	0	29	18	1	0	10	0	0
916	Greyhound	258	6021	1892	1897	Town	0	44	40	3	0	1	0	0
917	Greyhound	258	6022	1898	1902	Town	0	71	70	0	0	1	0	0
918	Greyhound	258	6024	1903	1907	Town	0	70	70	0	0	0	0	0
919	Greyhound	258	6028	1910	1912	Town	0	31	31	0	0	0	0	0
920	Greyhound	258	6037	1862	1864	CoML	393	24	7	0	0	0	0	17
921	Greyhound	258	6038	1865	1867	CoML	520	55	15	9	0	0	0	30
922	Greyhound	258	6039	1868	1871	Town	0	8	7	1	0	0	0	0
923	Halcyon	1510	6062	1843	1844	CoML	305	62	0	33	0	5	0	24
924	Hamilton	1511	6063	1835	1836	Maury	270	52	0	0	0	0	0	52
925	Hamilton II	1515	6094	1839	1840	Maury	336	52	0	0	0	0	0	52
926	Hamilton II	1515	6096	1840	1843	Maury	519	79	0	0	0	0	0	79
927	Hannibal	1530	6148	1828	1829	Maury	30	0	0	0	0	0	0	0
928	Hannibal	1530	6153	1833	1834	Maury	204	28	0	0	0	0	0	28
929	Hanover	1532	6166	1851	1851	CoML	81	82	7	0	0	0	0	73
930	Hanover	1532	6167	1852	1852	CoML	106	39	7	0	0	0	0	32
932	Hanover	1532	6168	1853	1853	CoML	131	25	4	0	0	0	0	21
931	Hanover	1532	6168	1853	1853	Maury	126	19	4	0	0	0	0	15
933	Harbinger	1535	6172	1842	1844	CoML	701	143	21	33	0	6	0	83
934	Harvest	281	6229	1837	1838	Maury	191	0	0	0	0	0	0	0
935	Harvest	281	6230	1838	1840	Maury	506	0	0	0	0	0	0	0
938	Harvest	282	6248	1845	1848	Maury	1048	38	36	0	0	0	0	1
936	Harvest	1551	6236	1843	1846	Maury	615	115	15	100	0	0	0	0
937	Harvest	1551	6238	1850	1853	Town	0	19	1	1	17	0	0	0
939	Hector	268	6297	1832	1834	Town	0	42	42	0	0	0	0	0
940	Hector	268	6298	1834	1837	Maury	720	107	107	0	0	0	0	0
941	Hector	268	6298	1834	1837	Town	0	50	50	0	0	0	0	0
942	Hector	268	6299	1838	1840	Maury	599	83	12	0	0	0	0	71
943	Hector	268	6300	1840	1843	Maury	748	85	85	0	0	0	0	0
944	Hector	268	6300	1840	1843	Town	0	47	47	0	0	0	0	0
945	Henry Astor	1571	6419	1831	1835	Maury	839	132	130	2	0	0	0	0
946	Henry Astor	1571	6423	1844	1848	Maury	1054	93	93	0	0	0	0	0
947	Henry H. Crapo	1574	6431	1852	1854	Town	0	21	21	0	0	0	0	0
948	Henry Kneeland	280	6434	1845	1848	Maury	576	66	3	2	0	0	0	61
949	Henry Kneeland	280	6436	1851	1854	CoML	287	197	9	89	0	0	0	97
950	Henry Lee	1575	6440	1842	1845	Maury	504	178	0	0	0	0	0	178
951	Henry Tuke	1578	6454	1844	1848	Maury	1022	131	0	2	0	0	0	129
952	Herald	776	6472	1829	1830	Town	0	23	2	21	0	0	0	0
953	Herald	776	6473	1830	1831	Town	0	25	4	21	0	0	0	0
954	Herald	776	6476	1833	1834	Town	0	14	12	2	0	0	0	0
955	Herald	776	6480	1838	1840	Town	0	42	42	0	0	0	0	0
956	Herald	1586	6511	1841	1843	Maury	294	0	0	0	0	0	0	0
957	Herald	1586	6512	1843	1845	Maury	162	62	0	0	0	0	0	62
958	Herald II	274	6514	1830	1834	Town	0	9	1	8	0	0	0	0
959	Herald II	274	6519	1847	1851	Maury	834	96	2	78	0	0	0	16
960	Hero	1592	6598	1860	1861	CoML	101	42	1	16	0	1	0	24
961	Heroine	1597	6606	1829	1831	Town	0	30	0	30	0	0	0	0
962	Heroine	1597	6607	1831	1832	Town	0	14	1	13	0	0	0	0
963	Heroine	1597	6611	1835	1836	Town	0	17	4	13	0	0	0	0
964	Heroine	1597	6612	1836	1837	Maury	146	58	4	54	0	0	0	0
965	Heroine	1597	6612	1836	1837	Town	0	22	3	19	0	0	0	0
966	Heroine	1597	6613	1837	1839	Town	0	28	6	22	0	0	0	0
967	Heroine	1597	6615	1841	1843	Maury	315	82	9	72	0	0	0	1
968	Heroine	1597	6617	1843	1845	Maury	56	0	0	0	0	0	0	0
969	Hesper	267	6627	1844	1848	Maury	1006	0	0	0	0	0	0	0
970	Hesper	267	6637	1828	1830	Maury	531	77	77	0	0	0	0	0
971	Hesper	267	6639	1834	1838	Maury	1120	38	38	0	0	0	0	0
972	Hibernia	273	6653	1830	1831	Maury	283	0	0	0	0	0	0	0
973	Hibernia	273	6654	1831	1832	Maury	225	0	0	0	0	0	0	0
974	Hibernia	273	6655	1832	1833	Maury	277	0	0	0	0	0	0	0
975	Hibernia	273	6662	1840	1842	Town	0	11	11	0	0	0	0	0
976	Hibernia	273	6663	1842	1844	Town	0	33	9	17	0	7	0	0
977	Hibernia II	285	6673	1857	1862	Town	0	14	0	0	14	0	0	0
978	Hibernia II	285	6676	1866	1870	Town	0	35	11	11	12	0	0	1
979	Hibernia II	285	6678	1844	1847	Maury	598	90	0	0	0	0	0	90
980	Hobomok	1606	6710	1844	1848	Town	0	27	21	5	0	1	0	0
981	Homer	1609	6720	1855	1856	CoML	371	81	11	0	0	20	0	50
982	Hoogly	1610	6724	1837	1840	Maury	384	36	17	1	0	0	0	18
983	Hoogly	1610	6725	1840	1843	Maury	616	61	40	0	0	0	0	21
988	Hope	210	6771	1847	1850	Maury	688	36	36	0	0	0	0	0
985	Hope	270	6757	1832	1835	Maury	739	153	5	0	0	0	0	148
984	Hope	2835	6734	1861	1862	CoML	507	51	13	0	0	1	0	37
987	Hope II	278	6769	1844	1847	Maury	710	91	26	37	0	0	0	28
986	Hope II	278	6769	1844	1847	Town	0	42	38	4	0	0	0	0
989	Hope II	278	6777	1857	1863	Town	0	4	4	0	0	0	0	0
990	Hopeton	1621	6789	1859	1860	CoML	403	58	20	0	0	3	0	35
991	Hopeton	1621	6790	1860	1861	CoML	374	39	9	0	0	3	0	27
992	Hopewell	1623	6793	1844	1848	Maury	745	129	7	1	0	0	0	121
993	Houqua	275	6807	1831	1835	Maury	873	66	66	0	0	0	0	0
994	Howard	1624	6817	1835	1838	Maury	668	105	101	4	0	0	0	0
995	Howard	1624	6818	1838	1841	Maury	714	100	99	1	0	0	0	0
996	Howard	1624	6819	1841	1845	Town	0	37	37	0	0	0	0	0
997	Hunter	288	6854	1859	1863	Town	0	35	27	8	0	0	0	0
998	Hunter	288	6857	1867	1871	Town	0	39	37	0	0	2	0	0
999	Hunter	288	6860	1875	1878	Town	0	2	2	0	0	0	0	0
1000	Huntress	277	6886	1832	1836	Maury	981	99	92	7	0	0	0	0
1001	Huntress	277	6887	1836	1837	Maury	194	46	11	17	0	0	0	18
1002	Huntress	277	6889	1839	1841	Maury	331	115	20	25	0	0	0	70
1003	Huntress	277	6890	1841	1844	Maury	670	52	0	0	0	0	0	52
1004	Huntress	277	6891	1844	1847	Town	0	23	2	21	0	0	0	0
1005	Huntsville	1633	6899	1847	1849	Maury	387	59	2	0	0	0	0	57
1006	Huron	1634	6912	1843	1845	Maury	445	85	0	0	0	0	0	85
1007	Huron	1634	6913	1845	1848	Maury	440	84	0	0	0	0	0	84
1008	Hydaspe	269	6921	1826	1827	Maury	237	73	6	35	0	0	0	32
1009	Hydaspe	269	6930	1841	1845	Maury	1011	75	4	0	0	0	0	71
1010	Illinois	310	6938	1853	1857	Town	0	4	1	0	3	0	0	0
1011	Imogene	1641	6960	1838	1838	CoML	57	33	13	0	0	1	0	19
1012	Imogene	1641	6961	1839	1839	CoML	52	60	18	0	0	3	0	36
1013	India	302	6987	1843	1845	CoML	544	198	6	142	0	8	0	40
1014	India	302	6987	1843	1845	Maury	404	112	4	108	0	0	0	0
1015	India	302	6988	1845	1848	Maury	704	133	9	124	0	0	0	0
1016	Indus	1648	7019	1822	1823	Maury	181	49	0	42	0	0	0	7
1017	Industry	1654	7073	1827	1827	CoML	19	21	11	0	0	0	0	8
1018	Industry	1654	7074	1828	1828	CoML	169	43	23	0	0	4	0	16
1019	Industry	1654	7075	1828	1829	CoML	190	31	12	0	0	3	0	16
1020	Iris	300	7122	1843	1847	Maury	926	119	42	48	0	0	0	29
1021	Isaac Howland	303	7147	1839	1843	Maury	1038	117	114	3	0	0	0	0
1022	Isaac Howland	303	7148	1843	1845	Maury	324	108	4	11	0	0	0	92
1023	Isaac Howland	303	7149	1845	1848	Maury	728	164	5	149	0	0	0	10
1024	Isabella	304	7157	1831	1834	CoML	988	124	90	1	0	0	0	32
1025	Isabella	304	7157	1831	1834	Maury	866	84	81	1	0	0	0	2
1026	Isabella	304	7157	1831	1834	Town	0	41	41	0	0	0	0	0
1028	Isabella	304	7162	1841	1845	Maury	1152	101	84	2	0	0	0	15
1029	Isabella	304	7163	1845	1848	Maury	805	135	31	88	0	0	0	16
1030	Isabella	423	7170	1880	1881	CoML	462	14	0	0	10	0	0	4
1031	Isabella	423	7170	1880	1881	Town	0	3	0	0	3	0	0	0
1032	Isabella	423	7171	1882	1883	Town	0	6	0	0	6	0	0	0
1027	Isabella	1663	7159	1835	1837	Maury	522	77	60	15	0	0	0	2
1033	Israel	305	7189	1841	1843	Maury	427	93	13	31	0	0	0	49
1034	Italy	2759	7197	1849	1851	Maury	111	29	4	4	0	0	0	21
1035	J. E. Donnell	331	7216	1845	1849	Maury	730	177	11	166	0	0	0	0
1036	J. E. Donnell	331	7218	1851	1853	Maury	367	97	7	1	0	0	0	88
1037	J. Taylor	1671	7222	1866	1867	CoML	43	8	0	0	0	0	0	8
1038	James Allen	329	7254	1844	1848	Maury	1025	88	58	0	0	0	0	30
1039	James Allen	329	7254	1844	1848	Town	0	50	50	0	0	0	0	0
1040	James Arnold	340	7280	1853	1856	Town	0	42	40	1	0	1	0	0
1041	James Arnold	340	7281	1857	1861	Town	0	10	10	0	0	0	0	0
1042	James Arnold	340	7293	1892	1894	CoML	507	80	26	5	0	3	0	46
1043	James Maury	330	7307	1848	1851	Maury	509	64	3	0	0	0	0	61
1044	James Munroe (Monroe)	1677	7322	1840	1843	Town	0	35	26	8	0	1	0	0
1045	James Munroe (Monroe)	1677	7323	1844	1847	Maury	855	108	38	58	0	0	0	12
1046	Janet	354	7359	1848	1851	Maury	763	57	25	1	0	0	0	31
1047	Janet	354	7361	1852	1854	Town	0	9	9	0	0	0	0	0
1048	Janus	322	7370	1835	1837	Maury	409	28	0	0	0	0	0	28
1049	Janus	322	7371	1837	1839	Maury	326	119	15	81	0	0	0	23
1050	Jason	1690	7405	1841	1842	Maury	233	35	0	0	0	0	0	35
1051	Jason	1690	7406	1842	1844	Maury	383	54	0	0	0	0	0	54
1053	Jasper	318	7420	1839	1840	Town	0	17	3	14	0	0	0	0
1054	Jasper	318	7421	1840	1842	Town	0	14	2	12	0	0	0	0
1052	Jasper	1691	7412	1834	1835	Maury	308	37	9	28	0	0	0	0
1055	Java	317	7426	1829	1830	Maury	173	44	2	20	0	0	0	22
1056	Java	317	7442	1860	1864	Town	0	22	18	4	0	0	0	0
1057	Java II	349	7456	1838	1841	Town	0	28	12	16	0	0	0	0
1058	Java II	349	7458	1841	1845	CoML	1096	84	78	1	0	2	0	3
1059	Jefferson	1695	7506	1839	1841	Maury	450	47	0	0	0	0	0	47
1060	Jefferson	1695	7507	1841	1844	Town	0	39	23	16	0	0	0	0
1061	Jefferson II	1698	7511	1845	1847	Maury	140	0	0	0	0	0	0	0
1062	Jireh Perry	337	7534	1868	1871	Town	0	4	4	0	0	0	0	0
1063	John	319	7562	1836	1838	Town	0	36	7	29	0	0	0	0
1064	John	319	7566	1844	1848	Maury	1047	78	69	9	0	0	0	0
1065	John	319	7567	1848	1851	Maury	939	0	0	0	0	0	0	0
1066	John and Elizabeth	1707	7652	1840	1842	Maury	427	27	0	0	0	0	0	27
1067	John and Elizabeth	1707	7653	1842	1844	Maury	358	29	0	0	0	0	0	29
1068	John and Elizabeth	1707	7656	1850	1855	Maury	131	0	0	0	0	0	0	0
1069	John and Winthrop	355	7669	1885	1888	CoML	796	425	38	33	0	32	0	322
1070	John B. Dods	1710	7694	1842	1843	CoML	40	8	3	0	0	0	0	4
1071	John Dawson	343	7717	1853	1855	Town	0	16	16	0	0	0	0	0
1072	John Dawson	343	7718	1855	1859	Town	0	13	13	0	0	0	0	0
1073	John Dawson	343	7719	1859	1861	Town	0	22	22	0	0	0	0	0
1074	John Dawson	343	7720	1862	1864	Town	0	18	17	0	0	1	0	0
1075	John Dawson	343	7721	1864	1866	Town	0	13	13	0	0	0	0	0
1076	John Dawson	343	7722	1867	1870	Town	0	17	17	0	0	0	0	0
1077	John Dawson	343	7723	1870	1872	Town	0	15	15	0	0	0	0	0
1078	John Dawson	343	7725	1872	1875	Town	0	17	17	0	0	0	0	0
1079	John Dawson	343	7728	1879	1884	Town	0	48	9	0	0	39	0	0
1080	John E. Smith	1711	7729	1851	1854	Town	0	1	1	0	0	0	0	0
1081	John Howland	321	7742	1851	1854	Maury	635	0	0	0	0	0	0	0
1082	John Jay	1714	7770	1845	1849	Maury	827	158	6	0	0	0	0	152
1083	John Wells	333	7821	1844	1846	Maury	266	34	0	0	0	0	0	34
1084	Jones	1723	7846	1841	1842	Maury	363	55	3	0	0	0	0	52
1085	Joseph Maxwell	353	7860	1833	1836	Maury	323	0	0	0	0	0	0	0
1086	Joseph Maxwell	353	7862	1837	1838	Maury	219	71	6	65	0	0	0	0
1087	Joseph Maxwell	353	7863	1838	1840	Maury	462	23	13	10	0	0	0	0
1088	Joseph Maxwell	353	7864	1840	1843	Maury	892	72	60	2	0	0	0	10
1089	Joseph Maxwell	353	7866	1848	1852	Town	0	19	19	0	0	0	0	0
1090	Joseph Maxwell	353	7873	1868	1871	Town	0	24	22	2	0	0	0	0
1091	Josephine	346	7887	1863	1867	CoML	314	146	2	0	2	7	11	124
1092	Josephine	449	7894	1905	1907	Town	0	48	19	29	0	0	0	0
1093	Josephine	449	7895	1907	1909	Town	0	31	11	20	0	0	0	0
1094	Josephine	1728	7896	1843	1846	Maury	204	101	0	0	0	0	0	101
1095	Judith	1733	7925	1784	1784	CoML	46	11	6	0	0	0	0	5
1096	Julian	323	7934	1847	1851	Maury	960	172	12	159	0	0	0	1
1097	Julius Caesar	1737	7939	1831	1832	Maury	71	60	0	0	0	0	0	60
1098	Julius Caesar	1737	7952	1844	1847	Maury	818	105	0	0	0	0	0	105
1099	Juno	316	7998	1838	1839	CoML	26	15	13	0	0	0	0	2
1100	Juno	316	7998	1838	1839	Town	0	11	11	0	0	0	0	0
1101	Kathleen	357	8038	1852	1855	CoML	766	321	20	4	0	32	0	265
1102	Keziah	738	8060	1788	1789	CoML	43	10	0	0	0	0	0	9
1103	Keziah	738	8064	1790	1791	CoML	59	31	0	0	0	0	0	31
1104	Keziah	738	8065	1792	1792	CoML	63	45	0	0	0	1	0	44
1105	Kutusoff	356	8091	1841	1845	Maury	810	163	9	76	0	0	0	78
1106	Kutusoff	356	8093	1848	1851	Maury	704	113	3	68	0	0	0	42
1107	Lady Adams	1760	8113	1802	1805	Maury	276	16	12	2	0	0	0	2
1108	Lafayette	379	8142	1840	1844	Maury	1125	79	76	0	0	0	0	3
1109	Lafayette	389	8147	1861	1861	CoML	154	48	11	0	0	1	0	36
1110	Lagoda	381	8155	1843	1846	Maury	700	162	4	5	0	0	0	153
1111	Lagoda	381	8158	1850	1853	Maury	390	0	0	0	0	0	0	0
1112	LaGrange	1766	8182	1843	1845	CoML	53	4	1	0	0	0	0	3
1113	Lancaster	370	8208	1848	1851	Maury	624	94	20	73	0	0	0	1
1114	Lancaster	370	8211	1858	1862	CoML	716	88	3	12	2	6	2	63
1115	Laurens	1776	8266	1845	1848	Maury	335	0	0	0	0	0	0	0
1116	Leander	1781	8281	1843	1845	Maury	174	0	0	0	0	0	0	0
1117	Leander	1781	8282	1845	1847	Maury	288	90	1	0	0	0	0	89
1118	Leander	1781	8286	1850	1852	Maury	244	0	0	0	0	0	0	0
1119	Leonidas	396	8342	1841	1842	CoML	327	38	17	0	0	1	0	20
1120	Lewis Bruce	1797	8412	1851	1851	CoML	23	2	0	0	0	0	0	0
1121	Lewis Bruce	1797	8413	1852	1852	CoML	23	2	0	0	0	0	0	0
1122	Lion	2652	8465	1841	1844	Maury	603	0	0	0	0	0	0	0
1123	Liverpool II	383	8498	1844	1847	Maury	683	180	7	35	0	0	0	138
1124	Loan	2657	8523	1838	1841	Maury	877	96	32	9	0	0	0	55
1125	Logan	371	8525	1830	1833	Maury	793	95	94	1	0	0	0	0
1126	Logan	371	8528	1838	1841	Maury	973	96	59	37	0	0	0	0
1127	London Packet II	374	8544	1844	1848	Maury	1209	69	63	6	0	0	0	0
1128	Lowell	1812	8625	1843	1845	Maury	385	38	0	0	0	0	0	38
1129	Lowell	1812	8626	1845	1848	Maury	835	143	0	0	0	0	0	143
1130	Luminary	1819	8683	1840	1843	Maury	745	111	14	0	0	0	0	97
1131	Luminary	1819	8684	1844	1847	CoML	882	338	6	36	0	49	0	247
1132	Luminary	1819	8685	1848	1852	Maury	476	12	0	6	0	0	0	6
1133	Lydia	1823	8694	1797	1799	Maury	395	63	49	13	0	0	0	1
1134	Magnet	1829	8758	1831	1835	Maury	1027	55	50	0	0	0	0	5
1135	Magnolia	419	8768	1845	1848	Maury	622	155	16	139	0	0	0	0
1136	Majestic	453	8792	1848	1851	Maury	764	0	0	0	0	0	0	0
1137	Majestic	453	8793	1851	1853	Maury	444	0	0	0	0	0	0	0
1138	Marcia	459	8870	1835	1836	Maury	296	65	6	19	0	0	0	40
1139	Marcia	459	8873	1841	1844	Maury	572	84	9	74	0	0	0	1
1140	Marcus	1841	8884	1837	1840	Maury	896	53	51	0	0	0	0	2
1141	Marcus	1842	8896	1829	1830	Maury	290	46	0	0	0	0	0	46
1142	Marcus	1842	8897	1831	1832	Maury	186	12	0	0	0	0	0	12
1143	Marcus	1842	8906	1840	1841	Maury	318	131	0	0	0	0	0	131
1144	Marcus	1842	8907	1841	1843	Maury	465	84	0	0	0	0	0	84
1145	Marcus	1842	8908	1843	1845	Maury	498	51	0	0	0	0	0	51
1146	Marcus	1842	8910	1830	1831	CoML	109	12	0	4	0	0	0	8
1147	Marcus	1842	8910	1830	1831	Maury	224	67	0	0	0	0	0	67
1148	Marengo	461	8915	1848	1851	Maury	571	117	1	114	0	0	0	2
1149	Maria	231	9004	1838	1840	Maury	508	27	26	1	0	0	0	0
1150	Maria	231	9006	1843	1846	Maury	692	65	62	0	0	0	0	3
1151	Maria Theresa	411	9015	1821	1823	CoML	248	108	6	5	0	0	0	97
1152	Maria Theresa	411	9021	1831	1835	Maury	907	101	93	5	0	0	0	3
1153	Maria Theresa	411	9027	1842	1844	Maury	372	82	0	0	0	0	0	82
1154	Maria Theresa	411	9030	1847	1851	Maury	835	163	20	143	0	0	0	0
1155	Mariner	1860	9038	1832	1836	Maury	973	77	77	0	0	0	0	0
1157	Mars	456	9063	1845	1848	Maury	562	39	14	2	0	0	0	23
1156	Mars	1864	9058	1803	1806	Maury	76	3	3	0	0	0	0	0
1159	Martha	401	9119	1815	1816	CoML	257	77	3	1	0	1	0	72
1160	Martha	401	9120	1816	1817	CoML	227	97	0	0	0	0	0	97
1158	Martha	1869	9090	1838	1841	Maury	821	80	4	10	0	0	0	66
1161	Mary	1895	9170	1836	1838	Maury	424	123	5	80	0	0	0	38
1162	Mary	1895	9171	1838	1840	Maury	482	117	36	66	0	0	0	14
1163	Mary	1895	9172	1841	1844	Maury	1034	33	1	31	0	0	0	1
1165	Mary and Helen II	1874	9228	1884	1885	CoML	222	110	0	2	7	7	22	72
1166	Mary and Susan	1875	9258	1844	1847	Maury	624	74	0	0	0	0	0	74
1167	Mary and Susan	1875	9260	1847	1850	CoML	621	331	13	97	6	23	13	179
1168	Mary Ann	415	9262	1829	1830	Maury	166	58	5	38	0	0	0	15
1164	Mary(s)	237	9201	1832	1833	CoML	268	11	3	0	0	1	0	7
1169	Maryland	409	9399	1821	1824	CoML	1047	159	101	8	0	6	0	44
1170	Massachusetts	444	9419	1848	1851	Maury	1089	0	0	0	0	0	0	0
1171	Mattapoisett	483	9441	1841	1842	CoML	34	11	10	0	0	0	0	1
1172	Mayflower	418	9476	1839	1841	Maury	611	0	0	0	0	0	0	0
1173	Mayflower	418	9477	1841	1844	Maury	633	169	7	160	0	0	0	2
1174	McDonough	1912	9485	1832	1834	Maury	65	1	0	0	0	0	0	1
1175	Mechanic	1915	9501	1834	1838	Maury	304	94	13	62	0	0	0	19
1176	Mentor	1923	9549	1843	1845	Maury	259	0	0	0	0	0	0	0
1177	Mercator	408	9564	1836	1840	Maury	913	81	64	16	0	0	0	1
1178	Mercator	408	9565	1840	1843	Maury	645	29	14	7	0	0	0	8
1179	Mercury	412	9574	1825	1827	CoML	761	242	113	3	0	13	0	113
1180	Mercury	412	9578	1833	1836	Maury	825	101	3	0	0	0	0	98
1181	Mercury	412	9579	1837	1840	Maury	889	127	3	0	0	0	0	124
1182	Mercury	412	9581	1841	1844	Maury	940	95	10	0	0	0	0	85
1183	Meridian	1930	9614	1839	1840	CoML	262	6	1	0	0	0	0	5
1184	Merrimack	1935	9647	1844	1847	Maury	267	24	1	0	0	0	0	23
1185	Metacom	450	9674	1845	1848	Maury	495	136	4	132	0	0	0	0
1186	Meteor	1937	9689	1851	1856	Maury	7	0	0	0	0	0	0	0
1187	Midas	405	9747	1861	1865	CoML	1476	96	18	2	3	17	1	55
1188	Milo	400	9770	1846	1849	Maury	681	154	13	141	0	0	0	0
1189	Milo	400	9771	1849	1851	Maury	493	80	7	72	0	0	0	1
1190	Milton	420	9778	1836	1839	Maury	590	101	22	27	0	0	0	52
1191	Milton	420	9779	1839	1842	Maury	591	56	18	37	0	0	0	1
1192	Milton	420	9780	1842	1844	Maury	465	107	2	103	0	0	0	2
1193	Milwood	403	9792	1817	1818	CoML	263	82	0	0	0	0	0	82
1194	Milwood	403	9793	1818	1820	CoML	376	175	1	2	0	1	0	171
1195	Milwood	403	9795	1821	1822	CoML	218	77	0	1	0	0	0	76
1196	Minerva	1948	9833	1799	1801	Maury	133	18	1	16	0	0	0	1
1197	Minerva	1948	9834	1801	1802	Maury	212	0	0	0	0	0	0	0
1198	Minerva Smyth	410	9905	1820	1823	Maury	407	0	0	0	0	0	0	0
1199	Minerva Smyth	410	9906	1824	1827	Maury	615	0	0	0	0	0	0	0
1200	Minerva Smyth	410	9907	1827	1830	Maury	540	0	0	0	0	0	0	0
1201	Minerva Smyth	410	9911	1836	1839	Maury	723	95	65	27	0	0	0	3
1202	Mobile	442	9932	1844	1848	Maury	1057	91	65	25	0	0	0	1
1203	Monmouth	1962	9961	1843	1846	Maury	503	127	0	0	0	0	0	127
1204	Montano	1965	9975	1845	1849	Maury	887	156	11	145	0	0	0	0
1205	Mount Vernon	437	10117	1836	1837	Maury	201	84	6	77	0	0	0	1
1206	Myra	1989	10151	1861	1863	CoML	628	49	14	0	0	4	0	31
1207	Nantasket	2011	10222	1843	1847	Maury	862	266	1	0	0	0	0	265
1208	Nassau	492	10278	1850	1853	CoML	932	90	9	17	44	4	0	16
1209	Nassau	492	10279	1853	1856	CoML	580	99	3	3	9	2	6	76
1210	Nathaniel P. Tallmadge	2020	10291	1836	1840	Maury	993	131	56	74	0	0	0	1
1211	Navigator	2023	10329	1841	1845	Maury	931	0	0	0	0	0	0	0
1213	Navy	495	10333	1845	1848	Maury	767	86	0	6	0	0	0	80
1214	Navy	495	10334	1848	1851	Maury	579	2	0	1	0	0	0	1
1215	Navy	495	10343	1840	1843	Maury	178	0	0	0	0	0	0	0
1212	Navy	495	10332	1843	1845	Maury	519	38	1	30	0	0	0	7
1216	Neptune	2032	10371	1839	1840	CoML	172	57	4	12	0	0	0	40
1217	Neptune	2032	10371	1839	1840	Maury	331	57	0	0	0	0	0	57
1218	Neptune	2032	10372	1840	1842	Maury	434	81	0	0	0	0	0	81
1219	Neptune	2032	10374	1844	1847	Maury	452	122	0	0	0	0	0	122
1220	Neptune	2034	10389	1832	1833	Maury	189	31	0	0	0	0	0	31
1221	Neptune	2034	10392	1834	1835	Maury	165	48	0	0	0	0	0	48
1222	Neptune	2034	10393	1835	1836	Maury	198	64	0	0	0	0	0	64
1223	Neptune	2034	10395	1837	1839	Maury	391	102	0	0	0	0	0	102
1224	Neptune	2034	10396	1839	1841	Maury	300	78	0	0	0	0	0	78
1225	New England	488	10416	1843	1845	Maury	507	102	0	0	0	0	0	102
1226	New England	488	10417	1845	1848	Maury	429	85	0	0	0	0	0	85
1227	Newark	501	10432	1835	1839	Maury	1097	96	17	0	0	0	0	79
1228	Newark	501	10438	1851	1855	Maury	480	18	2	2	0	0	0	14
1229	Newton	493	10456	1846	1849	Maury	682	122	37	84	0	0	0	1
1230	Newton	493	10457	1849	1851	Maury	483	48	9	39	0	0	0	0
1231	Niantic	2043	10461	1844	1847	Maury	494	0	0	0	0	0	0	0
1233	Nile	491	10489	1841	1844	Maury	653	136	69	67	0	0	0	0
1232	Nile	2046	10483	1845	1848	Maury	369	92	1	91	0	0	0	0
1234	Nimrod	494	10507	1848	1851	Maury	696	79	20	59	0	0	0	0
1235	Nimrod	2047	10526	1840	1841	Maury	201	34	0	0	0	0	0	34
1236	Nimrod	2047	10528	1841	1842	Maury	170	38	0	0	0	0	0	38
1237	Nimrod	2047	10530	1843	1844	Maury	202	22	0	0	0	0	0	22
1238	Noble	2051	10548	1837	1838	Maury	181	21	0	0	0	0	0	21
1239	Noble	2052	10557	1848	1850	Maury	305	39	3	1	0	0	0	35
1240	Noble	2052	10563	1859	1861	CoML	501	233	10	3	0	60	0	160
1241	North America	2056	10592	1844	1847	Maury	654	37	0	0	0	0	0	37
1242	North America	2058	10610	1836	1838	Maury	380	89	14	58	0	0	0	17
1243	Nye	477	10662	1844	1848	Maury	973	56	36	0	0	0	0	20
1244	Obed Mitchell	514	10676	1845	1848	Town	0	24	3	21	0	0	0	0
1245	Ocean	2074	10710	1852	1853	CoML	10	2	2	0	0	0	0	0
1246	Ocean Rover	2067	10723	1859	1862	CoML	911	329	26	16	0	19	0	267
1247	Octavia	502	10739	1835	1837	Maury	381	107	30	0	0	0	0	77
1248	Octavia	502	10740	1837	1839	Maury	368	12	8	1	0	0	0	3
1252	Ohio	517	10783	1862	1864	CoML	732	76	14	4	0	5	0	53
1253	Ohio	2083	10796	1844	1848	Maury	398	67	0	0	0	0	0	67
1249	Ohio II	516	10772	1833	1837	CoML	1079	209	89	4	0	15	0	101
1250	Ohio II	516	10775	1845	1848	Maury	634	122	9	29	0	0	0	84
1251	Ohio II	516	10776	1848	1851	Maury	439	96	7	10	0	0	0	79
1254	Oliver Crocker	519	10842	1850	1854	Town	0	30	30	0	0	0	0	0
1255	Oliver Crocker	519	10844	1858	1863	CoML	1363	266	16	12	14	12	59	153
1256	Oliver Crocker	519	10844	1858	1863	Town	0	92	8	3	12	21	48	0
1257	Olympia	513	10855	1847	1851	CoML	1128	244	79	0	0	5	0	158
1258	Ontario	520	10902	1836	1838	Maury	423	117	0	0	0	0	0	117
1259	Ontario	520	10904	1839	1840	Maury	161	52	0	0	0	0	0	52
1260	Ontario	520	10907	1842	1844	Maury	169	48	0	0	0	0	0	48
1261	Ontario II	2104	10916	1843	1845	Maury	270	47	0	0	0	0	0	47
1262	Orozimbo	511	11003	1840	1843	Maury	514	94	19	75	0	0	0	0
1264	Orozimbo	511	11005	1845	1848	Maury	719	105	4	18	0	0	0	83
1265	Orozimbo	511	11006	1848	1851	Maury	613	88	6	4	0	0	0	76
1263	Orozimbo	511	11004	1843	1845	Maury	371	124	12	112	0	0	0	0
1266	Oscar	2117	11021	1836	1838	Maury	657	53	51	2	0	0	0	0
1267	Osceola	727	11032	1851	1853	Maury	680	128	19	0	0	0	0	109
1268	Osceola III	728	11052	1865	1866	CoML	288	83	15	0	0	3	0	65
1271	Pacific	531	11137	1830	1831	Maury	224	0	0	0	0	0	0	0
1272	Pacific	531	11159	1832	1833	Maury	149	0	0	0	0	0	0	0
1269	Pacific	532	11117	1851	1854	CoML	919	328	12	15	38	9	46	208
1270	Pacific	532	11123	1826	1829	Maury	595	71	69	2	0	0	0	0
1273	Packet	527	11187	1822	1823	CoML	317	46	8	0	0	4	0	34
1274	Pantheon	541	11251	1841	1845	Maury	1000	85	37	48	0	0	0	0
1275	Parker	535	11281	1831	1835	CoML	1070	208	95	7	0	1	0	105
1276	Pearl Nelson	765	11346	1893	1896	CoML	1072	184	96	0	0	8	0	80
1277	Pearl Nelson	765	11347	1896	1899	CoML	888	192	90	0	0	14	0	88
1278	Pearl Nelson	765	11348	1900	1902	CoML	809	175	98	0	0	5	0	72
1279	Pedro Varela	557	11352	1881	1883	CoML	862	63	48	0	0	3	0	12
1280	Pedro Varela	557	11367	1917	1917	CoML	67	15	15	0	0	0	0	0
1281	Pembroke	2163	11375	1840	1841	Maury	301	12	0	0	0	0	0	12
1282	Pembroke	2163	11379	1843	1845	Maury	376	48	0	0	0	0	0	48
1283	Persia	525	11425	1843	1846	Maury	691	164	8	155	0	0	0	1
1284	Peruvian	2173	11458	1840	1844	Maury	1038	110	75	35	0	0	0	0
1285	Peruvian	2174	11463	1843	1845	Maury	438	59	0	0	0	0	0	59
1286	Peruvian	2174	11464	1845	1848	Maury	787	52	0	0	0	0	0	52
1287	Petrel	552	11476	1865	1866	CoML	179	112	2	0	0	64	0	46
1288	Phebe	2179	11524	1842	1847	Maury	1233	100	10	3	0	0	0	86
1289	Philetus	2181	11556	1837	1839	Maury	243	49	4	0	0	0	0	45
1290	Philip Tabb	2182	11569	1834	1836	Maury	517	0	0	0	0	0	0	0
1291	Philip Tabb	2182	11570	1833	1834	Maury	191	0	0	0	0	0	0	0
1292	Philip Tabb	2182	11572	1838	1840	Maury	401	0	0	0	0	0	0	0
1293	Philip Tabb	2182	11573	1840	1843	Maury	481	18	0	0	0	0	0	18
1294	Philip Tabb	2182	11574	1843	1845	Maury	208	0	0	0	0	0	0	0
1295	Phoenix	2188	11618	1827	1830	Maury	100	26	20	0	0	0	0	6
1296	Pilgrim	2192	11647	1842	1843	CoML	18	8	6	0	0	0	0	2
1297	Pioneer	534	11676	1834	1837	Maury	248	20	19	1	0	0	0	0
1298	Ploughboy	542	11755	1830	1834	CoML	1124	231	120	5	0	13	0	74
1299	Plymouth	2204	11769	1845	1849	Maury	255	144	1	0	0	0	0	143
1300	Pocahontas	536	11789	1832	1833	Maury	211	13	6	0	0	0	0	7
1301	Popmunett	2218	11855	1842	1843	CoML	21	4	0	0	0	0	0	4
1302	Portsmouth	2226	11875	1846	1849	Maury	219	104	0	0	0	0	0	104
1303	President	548	11906	1835	1838	Maury	832	82	69	8	0	0	0	5
1304	President	548	11907	1838	1842	Maury	993	74	70	1	0	0	0	3
1305	President	548	11908	1842	1847	Maury	838	0	0	0	0	0	0	0
1306	Quito	558	12040	1842	1843	CoML	95	91	12	0	0	9	0	69
1307	R. L. Barstow	2252	12063	1851	1853	CoML	699	83	16	0	0	0	0	67
1308	Richard Mitchell II	2288	12290	1829	1831	Maury	528	105	104	1	0	0	0	0
1309	Richard Mitchell II	2288	12291	1831	1834	Maury	812	122	122	0	0	0	0	0
1310	Richard Mitchell II	2288	12295	1848	1852	Maury	1043	94	62	3	0	0	0	29
1312	Richmond	572	12311	1831	1835	Maury	911	120	110	10	0	0	0	0
1311	Richmond	2290	12298	1843	1846	Maury	538	176	0	0	0	0	0	176
1313	Richmond	2291	12320	1844	1847	Maury	392	95	5	0	0	0	0	90
1314	Robert Browne	2303	12417	1845	1848	Maury	578	59	0	0	0	0	0	59
1315	Robert Edwards	575	12421	1841	1844	Maury	1021	67	67	0	0	0	0	0
1316	Robin Hood	2305	12440	1845	1848	Maury	111	12	3	0	0	0	0	9
1317	Rodman	563	12449	1827	1830	Maury	647	111	108	3	0	0	0	0
1318	Rodman	563	12454	1843	1847	Maury	852	93	77	0	0	0	0	16
1319	Rodman	563	12459	1855	1859	CoML	1257	153	43	13	0	3	0	94
1320	Roman	579	12465	1839	1842	Maury	992	93	70	1	0	0	0	22
1321	Roman II	580	12476	1836	1838	Maury	333	99	5	92	0	0	0	2
1322	Roman II	580	12477	1838	1840	Maury	302	102	5	97	0	0	0	0
1323	Roman II	580	12478	1840	1842	Maury	257	0	0	0	0	0	0	0
1324	Roman II	580	12480	1844	1847	Maury	733	168	27	58	0	0	0	83
1325	Romulus	2312	12497	1845	1848	Maury	689	143	4	0	0	0	0	139
1326	Rosario	2319	12541	1891	1891	CoML	186	10	0	0	8	0	0	2
1327	Roscius	583	12552	1861	1862	CoML	375	81	36	0	0	0	0	45
1328	Roscoe	564	12570	1860	1864	CoML	1359	337	60	27	0	85	0	165
1329	Roscoe II	577	12574	1836	1837	Maury	177	43	1	42	0	0	0	0
1330	Roscoe II	577	12575	1837	1839	Maury	429	85	15	70	0	0	0	0
1331	Roscoe II	577	12579	1846	1849	Maury	580	54	35	19	0	0	0	0
1332	Rousseau	578	12620	1841	1845	Maury	1135	96	28	43	0	0	0	25
1333	Rousseau	578	12621	1845	1849	Maury	991	78	54	16	0	0	0	8
1334	Rowena	2316	12634	1841	1843	CoML	127	168	10	125	0	0	0	23
1335	Roxana	2733	12639	1821	1824	Maury	756	85	83	1	0	0	0	1
1336	Russell	562	12665	1820	1822	Maury	129	0	0	0	0	0	0	0
1337	Russell	2321	12677	1832	1834	Maury	311	60	10	41	0	0	0	9
1338	S. R. Soper	2328	12700	1860	1860	CoML	41	18	7	0	0	0	0	11
1339	Salem	2713	12722	1844	1848	Maury	834	33	0	0	0	0	0	33
1340	Sally Anne	601	12753	1832	1833	Maury	275	61	2	59	0	0	0	0
1341	Sally Anne	601	12756	1836	1838	Maury	445	97	8	1	0	0	0	88
1342	Samuel Robertson	606	12807	1835	1837	Maury	289	0	0	0	0	0	0	0
1343	Samuel Robertson	606	12808	1837	1840	Maury	342	0	0	0	0	0	0	0
1345	Sarah	2358	12865	1839	1843	Maury	1101	108	106	2	0	0	0	0
1344	Sarah	2359	12846	1846	1848	Maury	193	17	2	14	0	0	0	1
1346	Sarah Frances	2347	12922	1843	1847	Maury	1094	75	72	0	0	0	0	3
1347	Sarah Louisa	607	12935	1840	1842	CoML	86	27	14	0	0	0	0	13
1348	Sarah W. Hunt	768	12950	1892	1893	CoML	243	98	36	0	0	2	0	60
1349	Sarah W. Hunt	768	12951	1893	1896	CoML	1019	95	64	0	0	0	0	31
1350	Science	609	12973	1834	1838	Maury	1199	124	80	44	0	0	0	0
1351	Science	609	12974	1838	1841	Maury	690	136	19	117	0	0	0	0
1352	Scotland	618	12980	1860	1860	CoML	137	74	11	0	0	2	0	61
1353	Selma	605	13117	1839	1841	Maury	351	85	8	62	0	0	0	15
1354	Sheffield	2384	13151	1845	1849	Maury	718	191	6	0	0	0	0	185
1355	Sheffield	2384	13152	1849	1854	Maury	877	115	1	11	0	0	0	103
1356	Shepherdess	2385	13154	1842	1844	Maury	202	31	3	0	0	0	0	28
1357	Silas Richards	625	13177	1844	1847	Maury	795	70	0	0	0	0	0	70
1358	Solon	631	13218	1838	1839	CoML	243	79	2	0	0	4	0	73
1359	Sophia	600	13237	1829	1830	Maury	222	58	4	54	0	0	0	0
1360	South America	2405	13262	1823	1824	CoML	206	79	4	29	0	3	0	43
1361	South Boston	2407	13271	1833	1835	Maury	356	103	1	102	0	0	0	0
1362	South Boston	2407	13272	1835	1837	Maury	444	73	15	58	0	0	0	0
1363	South Boston	2407	13275	1842	1845	Maury	597	102	8	92	0	0	0	2
1364	South Boston	2407	13277	1848	1851	Maury	570	0	0	0	0	0	0	0
1365	Splendid	2419	13337	1844	1848	Maury	318	7	4	0	0	0	0	3
1366	Splendid	2420	13342	1835	1839	Maury	1140	0	0	0	0	0	0	0
1367	Splendid	2420	13343	1839	1843	Maury	1117	0	0	0	0	0	0	0
1368	Splendid	2420	13345	1843	1846	Maury	651	105	2	98	0	0	0	5
1369	Splendid	2420	13348	1854	1858	CoML	1198	117	15	14	19	1	21	47
1370	St. Lawrence	2426	13372	1844	1848	Maury	494	50	0	0	0	0	0	50
1371	St. Peter	608	13374	1839	1842	Maury	794	87	18	69	0	0	0	0
1372	Stanton	2428	13417	1828	1830	CoML	528	147	2	0	0	9	0	136
1373	Stanton	2428	13419	1833	1836	Maury	746	102	102	0	0	0	0	0
1374	Statira	613	13441	1843	1845	Maury	266	60	0	60	0	0	0	0
1375	Statira	613	13443	1845	1848	Maury	612	131	5	126	0	0	0	0
1376	Statira	613	13444	1848	1853	Maury	959	2	2	0	0	0	0	0
1377	Stonington	2437	13479	1831	1832	Maury	263	0	0	0	0	0	0	0
1378	Stonington	2437	13480	1832	1833	Maury	270	0	0	0	0	0	0	0
1379	Stonington	2437	13488	1843	1847	Maury	523	129	0	0	0	0	0	129
1380	Superior	616	13551	1857	1860	Town	0	21	13	0	8	0	0	0
1381	Superior	616	13565	1843	1845	Maury	567	2	0	0	0	0	0	2
1382	Superior	616	13566	1845	1847	Maury	649	0	0	0	0	0	0	0
1383	Susan	611	13590	1845	1848	Maury	908	40	31	9	0	0	0	0
1384	Tenedos	2481	13749	1840	1842	Maury	585	50	5	0	0	0	0	45
1385	Thames	2482	13772	1833	1834	Maury	396	54	0	0	0	0	0	54
1386	Thames	2482	13773	1834	1835	Maury	270	70	0	0	0	0	0	70
1387	Thames	2482	13774	1835	1836	Maury	168	35	0	0	0	0	0	35
1388	Theophilus Chase	2484	13785	1842	1844	CoML	76	18	14	0	0	0	0	4
1389	Thomas Dickason	657	13801	1869	1871	Town	0	2	1	0	0	0	0	1
1390	Thomas Dickason	657	13803	1837	1839	Maury	388	106	3	0	0	0	0	103
1391	Thomas Dickason	657	13804	1839	1841	Maury	383	129	10	0	0	0	0	119
1392	Thomas Dickason	657	13805	1841	1844	Maury	724	188	8	0	0	0	0	180
1393	Thomas Winslow	661	13875	1841	1842	CoML	28	11	5	0	0	0	0	6
1394	Thorn	2496	13904	1832	1833	Maury	219	72	0	0	0	0	0	72
1395	Thorn	2496	13905	1833	1834	Maury	231	67	0	0	0	0	0	67
1396	Thorn	2496	13906	1834	1835	Maury	243	64	2	0	0	0	0	62
1397	Thorn	2496	13907	1835	1836	Maury	225	65	5	0	0	0	0	60
1398	Thorn	2496	13908	1836	1837	Maury	208	65	6	0	0	0	0	59
1399	Thorn	2496	13909	1837	1838	Maury	18	0	0	0	0	0	0	0
1400	Timoleon	649	13975	1819	1820	Maury	157	48	3	21	0	0	0	24
1401	Timoleon	649	13987	1839	1843	Maury	987	99	98	1	0	0	0	0
1402	Timoleon	649	13988	1843	1845	Maury	178	0	0	0	0	0	0	0
1403	Trescott	2505	14013	1845	1848	Maury	473	66	2	0	0	0	0	64
1404	Triton	647	14071	1828	1831	CoML	624	120	65	1	0	9	0	45
1405	Triton	2513	14119	1845	1848	Maury	171	16	7	0	0	0	0	9
1406	Tuscarora	2518	14168	1845	1848	Maury	699	117	0	0	0	0	0	117
1407	Two Brothers	648	14192	1834	1835	Maury	293	57	7	27	0	0	0	23
1408	Two Brothers	648	14196	1840	1841	Maury	262	49	0	1	0	0	0	48
1409	Two Brothers	648	14199	1847	1851	Maury	956	90	37	52	0	0	0	1
1410	Tybee	2521	14209	1843	1846	Maury	29	0	0	0	0	0	0	0
1411	Uncas	665	14234	1843	1846	Maury	559	131	0	131	0	0	0	0
1412	Uncas	665	14236	1849	1851	Maury	379	95	8	87	0	0	0	0
1413	Union	663	14260	1807	1807	CoML	21	2	1	0	0	0	0	1
1414	Union	2532	14278	1875	1876	CoML	27	3	1	0	0	0	0	2
275	Unknown	Unk	Unk	1842	1844	Maury	427	89	0	0	0	0	0	89
1415	Uxor	2544	15049	1838	1839	Maury	99	0	0	0	0	0	0	0
1416	Varnum H. Hill	2551	15101	1863	1865	CoML	100	43	6	0	0	0	0	37
1417	Victory	668	15152	1824	1825	CoML	295	47	5	1	0	0	0	41
1418	Victory	668	15154	1826	1829	Maury	759	88	84	1	0	0	0	3
1419	Victory	668	15157	1832	1835	Maury	830	55	19	0	0	0	0	36
1420	Vigilant	672	15166	1870	1874	CoML	1166	259	65	9	0	2	0	183
1421	Vineyard	2564	15173	1844	1847	Maury	247	51	1	0	0	0	0	50
1422	Virginia	669	15195	1843	1847	Maury	1029	87	15	0	0	0	0	72
1423	Wabash	2572	15237	1831	1832	Maury	184	48	0	0	0	0	0	48
1424	Walter Irving	2574	15261	1856	1858	CoML	34	22	7	0	0	0	0	14
1428	Washington	686	15388	1842	1844	Maury	556	66	5	61	0	0	0	0
1425	Washington	2588	15357	1858	1859	CoML	394	62	20	0	0	4	0	38
1426	Washington	2593	15378	1828	1832	Maury	1137	114	113	1	0	0	0	0
1427	Washington	2593	15383	1843	1847	Maury	1045	66	66	0	0	0	0	0
1429	Washington Freeman	2586	15401	1867	1868	CoML	75	22	0	0	0	0	0	22
1430	Washington Freeman	2586	15402	1868	1870	CoML	533	109	10	0	0	20	0	78
1431	Waverly	688	15464	1838	1842	Maury	1068	88	76	1	0	0	0	11
1432	Waverly	688	15466	1846	1849	Maury	677	137	6	131	0	0	0	0
1433	Weymouth	2599	15481	1821	1824	Maury	723	107	105	2	0	0	0	0
1434	William	2625	15502	1838	1838	CoML	92	17	3	0	0	1	0	13
1435	William and Eliza	680	15570	1844	1848	Maury	1005	78	29	0	0	0	0	49
1436	William and Eliza	680	15572	1848	1852	CoML	1167	272	54	0	0	25	0	193
1437	William Baker	2610	15597	1834	1836	Maury	325	60	3	0	0	0	0	57
1438	William Baker	2610	15599	1838	1839	CoML	217	82	6	53	0	2	0	21
1439	William Baker	2610	15599	1838	1839	Maury	120	26	2	0	0	0	0	24
1440	William Baker	2610	15601	1841	1843	Maury	403	110	6	29	0	0	0	75
1441	William Hamilton	687	15651	1842	1845	Maury	518	138	22	116	0	0	0	0
1442	William Hamilton	687	15652	1845	1848	Maury	605	153	6	12	0	0	0	135
1443	William Tell	2622	15721	1843	1846	Maury	527	78	0	0	0	0	0	78
1444	William Tell	2622	15722	1846	1848	Maury	650	70	11	0	0	0	0	59
1445	William Wilson	710	15755	1874	1875	CoML	12	3	1	0	0	0	0	2
1446	William Wilson	710	15756	1876	1876	CoML	147	31	1	0	0	0	0	30
1447	Willis	694	15784	1861	1862	Town	0	8	4	0	0	4	0	0
1448	Wilmington and Liverpool Packet	681	15795	1830	1833	Maury	613	53	53	0	0	0	0	0
1449	Young Eagle	2644	15860	1832	1835	Maury	877	108	100	5	0	0	0	3
1450	Young Eagle	2644	15864	1843	1847	Maury	1145	59	58	1	0	0	0	0
1451	Young Hero	2645	15868	1842	1846	Maury	1209	63	54	0	0	0	0	9
1452	Young Phenix	698	15874	1830	1833	Maury	921	114	112	1	0	0	0	1
1453	Young Phenix	698	15875	1833	1836	Maury	770	80	79	1	0	0	0	0
1455	Young Phenix	698	15882	1860	1863	Town	0	31	24	7	0	0	0	0
1454	Young Phenix	698	15876	1836	1840	Maury	847	50	46	1	0	0	0	3
1456	Zephyr	699	15909	1839	1843	Maury	757	50	50	0	0	0	0	0
